# Supplementary material for: Aqueous MCRs of quaternary ammoniums, N-substituted formamides and sodium disulfide towards aryl thioamides
Source: Royal Society of Chemistry journal article supplement (doi:10.1039/c6qo00670a), 2016-12-19

# Supplementary Information

## **Aqueous MCRs of quaternary ammoniums, *N*-substituted formamides and sodium disulfide towards aryl thioamides**

Zhou Zhou, Jin-Tao Yu, Yongnan Zhou, Yan Jiang and Jiang Cheng\*

*School of Petrochemical Engineering, Jiangsu Key Laboratory of Advanced Catalytic Materials & Technology, Jiangsu Province Key Laboratory of Fine Petrochemical Engineering, Changzhou University, Changzhou 213164, P. R. China*

*Email: [jiangcheng@cczu.edu.cn](mailto:jiangcheng@cczu.edu.cn)*

### **Table of Contents**

|                                                                          |                |
|--------------------------------------------------------------------------|----------------|
| <b>1. General Information</b>                                            | <b>S2</b>      |
| <b>2. Experimental Procedures</b>                                        | <b>S2-S3</b>   |
| <b>3. Mechanistic Studies</b>                                            | <b>S3-S4</b>   |
| <b>4. Characterization Data for the Products</b>                         | <b>S5-S12</b>  |
| <b>5. References</b>                                                     | <b>S13</b>     |
| <b>6. Copies of the <sup>1</sup>H NMR and <sup>13</sup>C NMR Spectra</b> | <b>S14-S36</b> |

## 1. General Information

$^1\text{H}$  NMR and  $^{13}\text{C}$  NMR spectra were recorded at ambient temperature on 300 MHz or 400 MHz NMR spectrometer (75 MHz or 100 MHz for  $^{13}\text{C}$ ). NMR experiments are reported in  $\delta$  units, parts per million (ppm), and were referenced to  $\text{CDCl}_3$  ( $\delta$  7.26 or 77.0 ppm) as the internal standard. The coupling constants  $J$  are given in Hz. Column chromatography was performed using EM Silica gel 60 (300-400 mesh). HRMS were recorded on a TOF LC/MS equipped with electrospray ionization (ESI) probe operating in positive or negative ion mod.

## 2. Experimental Procedures

### 1) Synthesis of Aqueous Sodium Disulfide

Sodium sulfide hydrate (5.07 g, 65 mmol, 1 equiv) was added to water (50 mL) and the mixture was allowed to stir at 55 °C for 30 min. Subsequently, to the reaction mixture was added the sulfur (2.50 g, 78 mmol, 1.2 equiv) and stirred for another one hour at 55 °C. Then, the reaction mixture was cooled to room temperature and was filtered to afford aqueous sodium disulfide without further purification.

### 2) General Procedure for the Reductive Alkylation of Dimethylamine<sup>1</sup>

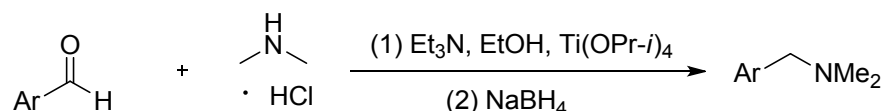

To a solution of triethylamine (2.0 g, 20 mmol) in absolute ethanol (15 mL) were added dimethylamine hydrochloride (1.65 g, 20 mmol), titanium isopropoxide (5.7 g, 20 mmol), and the starting aldehyde (10 mmol). The reaction mixture was stirred at 25 °C for 9-10 h, after which sodium borohydride (0.57 g, 15 mmol) was added and the resulting mixture was further stirred for a period of 10 h at 25 °C. The reaction was then quenched by pouring the mixture into aqueous ammonia (30 mL, 2 N), the resulting inorganic precipitate was filtered and washed with dichloromethane (50 mL), and the aqueous filtrate was extracted with dichloromethane (50 mL $\times$ 2). The combined dichloromethane extracts were dried ( $\text{K}_2\text{CO}_3$ ) and concentrated in vacuo to give pure *N,N*-dimethylated tertiary amines.

### 3) General Procedure for the Synthesis of Quaternary Ammonium Salts

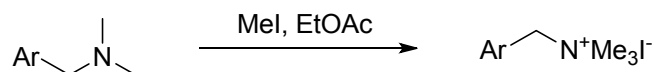

Methyl iodide (3.2 mL, 50 mmol, 5 equiv) was added to a solution of corresponding alkylated dimethylamine (10 mmol, 1 equiv) in ethyl acetate (10 mL) at room temperature and the resulting mixture was stirred for several minutes. The formed solid was filtered, washed with ethyl acetate and dried under reduced pressure, affording pure quaternary ammonium salt.

### 4) General Procedure for the *N*-Formylated Products<sup>2</sup>

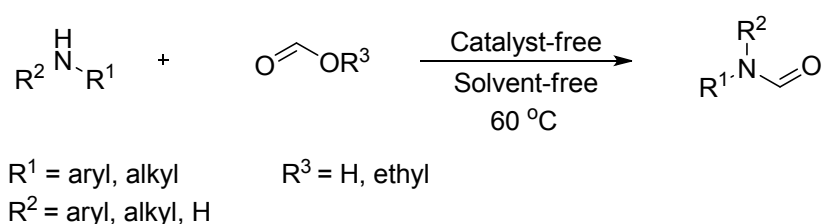

In a typical experimental procedure, corresponding amine (1 mmol) and formic acid (1.2 mmol) or ethyl formate (3 mmol) were carefully added to a sealed glass vial without any additional solvent or catalyst and were magnetically stirred at 60 °C. The progress of the reaction was monitored by TLC. After completion of the reaction, the reaction mixture was diluted by using DCM or EtOAc. The obtained organic mixture was then washed with water (10 mL  $\times$ 2) and a saturated solution of NaHCO<sub>3</sub> and was then dried over anhydrous Na<sub>2</sub>SO<sub>4</sub>. The solvent was evaporated in vacuo and the residue obtained was then subjected to recrystallization with a suitable solvent or was isolated through column chromatography to obtain pure *N*-formylated products.

## 3. Mechanistic Studies

### 3.1 GCMS results under standard conditions

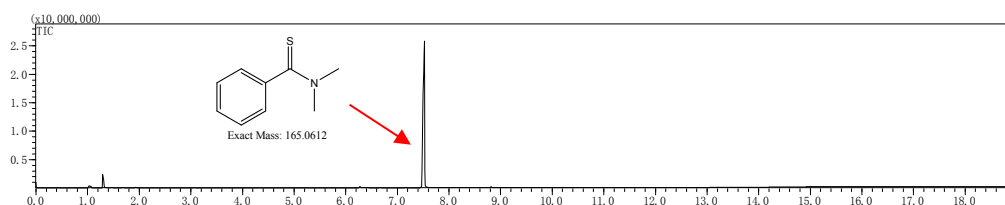

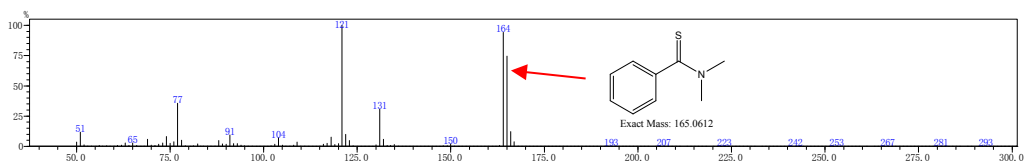

**Fig. S1** GCMS spectra of compound **4**

### 3.2 Free radical capture experiments

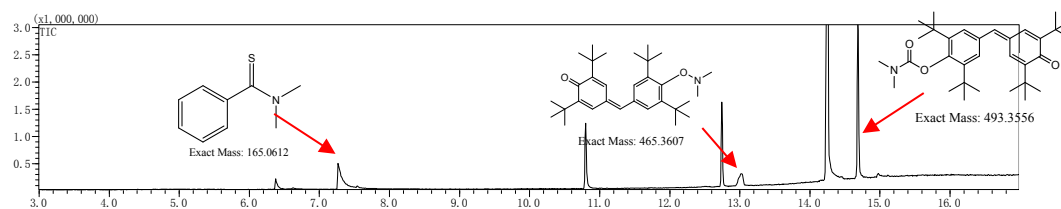

**Fig. S2** GC spectrum after 3 equivalent of Galvinoxyl free radical was added

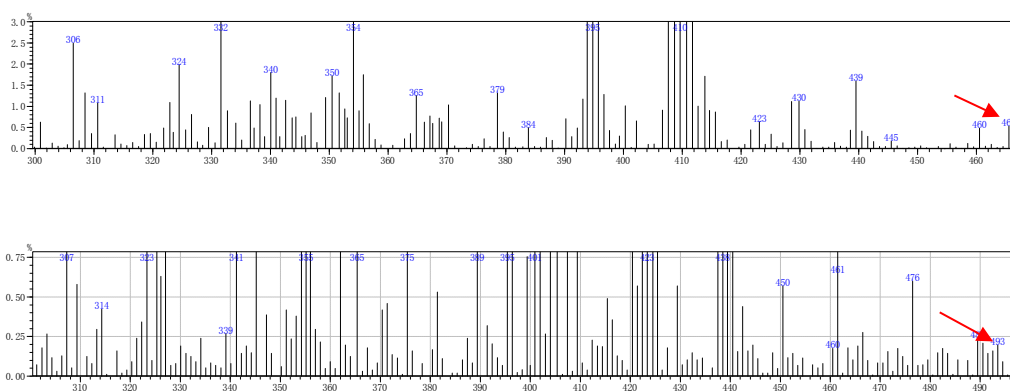

**Fig. S3** MS spectra of adducts formed by Galvinoxyl free radical with dimethyl carbamic radical and dimethylamino radical

### 3.3 GCMS results of HSNMe<sub>2</sub> under standard conditions

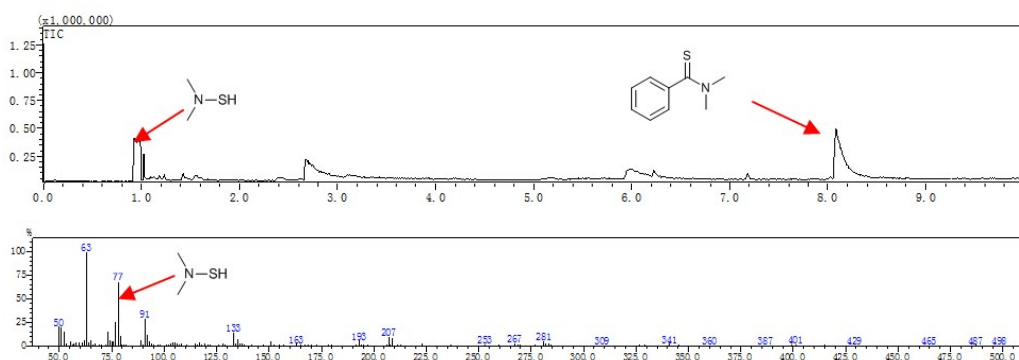

**Fig. S4** GCMS spectra of HSNMe<sub>2</sub>

#### 4. Characterization Data for the Products

##### *N,N*-Dimethylbenzothioamide 4<sup>3</sup>

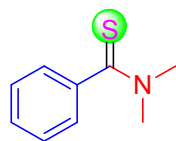

To a sealed tube were added *N,N,N*-trimethyl-1-phenylmethanamonium iodide (0.1 mmol, 27.7 mg), aqueous sodium disulfide (1.3 mmol, 1.3 M, 1 mL), DMF (77  $\mu$ L, 10 equiv). The mixture was stirred at 130  $^{\circ}$ C for 12 h under  $N_2$ . *N,N*-Dimethylbenzothioamide (14.0 mg, 85%) was obtained through column chromatography (PE: EA = 10: 1) as a yellow oil.  $^1H$  NMR ( $CDCl_3$ , 400 MHz)  $\delta$  7.39-7.26 (m, 5H), 3.60 (s, 3H), 3.16 (s, 3H);  $^{13}C$  NMR ( $CDCl_3$ , 75 MHz)  $\delta$  201.2, 143.3, 128.5, 128.3, 125.7, 44.1, 43.2.

##### *N,N*,4-Trimethylbenzothioamide 5<sup>3</sup>

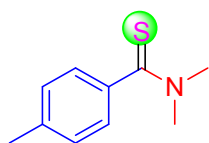

To a sealed tube were added *N,N,N*-trimethyl-1-(*p*-tolyl)methanamonium iodide (0.1 mmol, 29.1 mg), aqueous sodium disulfide (1.3 mmol, 1.3 M, 1 mL), DMF (77  $\mu$ L, 10 equiv). The mixture was stirred at 130  $^{\circ}$ C for 12 h under  $N_2$ . *N,N*,4-Trimethylbenzothioamide (13.8 mg, 77%) was obtained through column chromatography (PE: EA = 10: 1) as a yellow solid. Mp. 49-50  $^{\circ}$ C.  $^1H$  NMR ( $CDCl_3$ , 400 MHz)  $\delta$  7.20 (d,  $J$  = 8.1 Hz, 2H), 7.14 (d,  $J$  = 8.0 Hz, 2H), 3.59 (s, 3H), 3.17 (s, 3H), 2.34 (s, 3H);  $^{13}C$  NMR ( $CDCl_3$ , 100 MHz)  $\delta$  201.6, 140.5, 138.6, 128.8, 125.8, 44.1, 43.3, 21.2.

##### *N,N*-Dimethyl-4-(trifluoromethyl)benzothioamide 6<sup>3</sup>

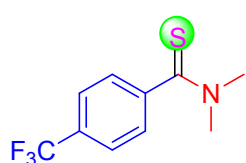

To a sealed tube were added *N,N,N*-trimethyl-1-(4-(trifluoromethyl)phenyl)methanamonium iodide (0.1 mmol, 34.5 mg), aqueous sodium disulfide (1.3 mmol, 1.3 M, 1 mL), DMF (77  $\mu$ L, 10 equiv). The mixture was stirred at 130  $^{\circ}$ C for 12 h under  $N_2$ . *N,N*-Dimethyl-4-(trifluoromethyl)benzothioamide (16.1 mg, 69%) was obtained through column chromatography (PE: EA = 5: 1) as a yellow oil.  $^1H$  NMR ( $CDCl_3$ , 400 MHz)  $\delta$  7.61 (d,  $J$  = 8.1 Hz, 2H), 7.40 (d,  $J$  = 8.1 Hz, 2H), 3.60 (s, 3H), 3.15 (s, 3H);  $^{13}C$  NMR ( $CDCl_3$ , 100 MHz)  $\delta$  199.2, 146.5, 130.2, 126.0, 125.5 (q,  $J$  = 3.8 Hz), 123.8 (q,  $J$  = 270.5 Hz), 44.0, 43.0.

##### 4-Methoxy-*N,N*-dimethylbenzothioamide 7<sup>3</sup>

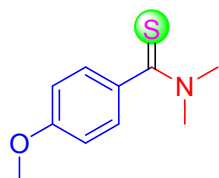

To a sealed tube were added 1-(4-methoxyphenyl)-*N,N,N*-

trimethylmethanamonium iodide (0.1 mmol, 30.7 mg), aqueous sodium disulfide (1.3 mmol, 1.3 M, 1 mL), DMF (77  $\mu$ L, 10 equiv). The mixture was stirred at 130 °C for 12 h under N<sub>2</sub>. 4-Methoxy-*N,N*-dimethylbenzothioamide (12.9 mg, 66%) was obtained through column chromatography (PE: EA = 10: 1) as a yellow oil. <sup>1</sup>H NMR (CDCl<sub>3</sub>, 400 MHz)  $\delta$  7.29 (d, *J* = 8.6 Hz, 2H), 6.84 (d, *J* = 8.6 Hz, 2H), 3.80 (s, 3H), 3.57 (s, 3H), 3.20 (s, 3H); <sup>13</sup>C NMR (CDCl<sub>3</sub>, 100 MHz)  $\delta$  201.2, 159.9, 135.7, 127.8, 113.4, 55.3, 44.3, 43.5.

#### 4-Amino-*N,N*-dimethylbenzothioamide 8<sup>4</sup>

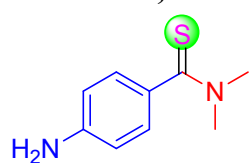

To a sealed tube were added 1-(4-aminophenyl)-*N,N,N*-trimethylmethanaminium iodide (0.1 mmol, 29.2 mg), aqueous sodium disulfide (1.3 mmol, 1.3 M, 1 mL), DMF (77  $\mu$ L, 10 equiv). The mixture was stirred at 130 °C for 12 h under N<sub>2</sub>. 4-Amino-*N,N*-dimethylbenzothioamide (16.6 mg, 87%) was obtained through column chromatography (PE: EA = 5: 1) as a yellow oil. <sup>1</sup>H NMR (CDCl<sub>3</sub>, 400 MHz)  $\delta$  7.18 (d, *J* = 8.5 Hz, 2H), 6.59 (d, *J* = 8.5 Hz, 2H), 3.84 (s, 2H), 3.56 (s, 3H), 3.22 (s, 3H); <sup>13</sup>C NMR (CDCl<sub>3</sub>, 100 MHz)  $\delta$  201.8, 147.4, 133.1, 128.2, 113.9, 44.4, 43.6. HRMS (ESI) *m/z* calcd for C<sub>21</sub>H<sub>15</sub>NNaO<sub>5</sub>(M+H)<sup>+</sup> 181.0794, found 181.0794.

#### 4-Bromo-*N,N*-dimethylbenzothioamide 9<sup>3</sup>

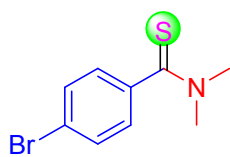

To a sealed tube were added 1-(4-bromophenyl)-*N,N,N*-trimethylmethanamonium iodide (0.1 mmol, 35.6 mg), aqueous sodium disulfide (1.3 mmol, 1.3 M, 1 mL), DMF (77  $\mu$ L, 10 equiv). The mixture was stirred at 130 °C for 12 h under N<sub>2</sub>. 4-Bromo-*N,N*-dimethylbenzothioamide (17.1 mg, 70%) was obtained through column chromatography (PE: EA = 10: 1) as a yellow solid. Mp. 120-121 °C. <sup>1</sup>H NMR (CDCl<sub>3</sub>, 400 MHz)  $\delta$  7.47 (d, *J* = 8.4 Hz, 2H), 7.18 (d, *J* = 8.4 Hz, 2H), 3.57 (s, 3H), 3.16 (s, 3H); <sup>13</sup>C NMR (CDCl<sub>3</sub>, 100 MHz)  $\delta$  199.8, 142.0, 131.5, 127.4, 122.7, 44.1, 43.2.

#### *N,N*-Dimethylnaphthalene-2-carbothioamide 10<sup>3</sup>

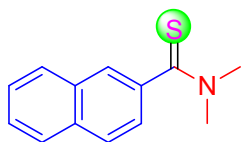

To a sealed tube were added *N,N,N*-trimethyl-1-(naphthalen-2-

yl)methanamonium iodide (0.1 mmol, 32.7 mg), aqueous sodium disulfide (1.3 mmol, 1.3 M, 1 mL), DMF (77  $\mu$ L, 10 equiv). The mixture was stirred at 130  $^{\circ}$ C for 12 h under  $N_2$ . *N,N*-Dimethylnaphthalene-2-carbothioamide (24.7 mg, 87%) was obtained through column chromatography (PE: EA = 10: 1) as a yellow oil.  $^1H$  NMR ( $CDCl_3$ , 400 MHz)  $\delta$  7.83-7.77 (m, 4H), 7.52-7.48 (m, 2H), 7.44-7.41 (m, 1H), 3.65 (s, 3H), 3.20 (s, 3H);  $^{13}C$  NMR ( $CDCl_3$ , 100 MHz)  $\delta$  201.1, 140.5, 133.0, 132.6, 128.3, 128.1, 127.6, 126.7, 126.6, 124.6, 123.8, 44.2, 43.2.

### *N,N*,3-Trimethylbenzothioamide 11<sup>3</sup>

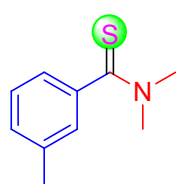

To a sealed tube were added *N,N,N*-trimethyl-1-(*m*-tolyl)methanamonium iodide (0.1 mmol, 29.1 mg), aqueous sodium disulfide (1.3 mmol, 1.3 M, 1 mL), DMF (77  $\mu$ L, 10 equiv). The mixture was stirred at 130  $^{\circ}$ C for 12 h under  $N_2$ . *N,N*,3-Trimethylbenzothioamide (13.2 mg, 74%) was obtained through column chromatography (PE: EA = 10: 1) as a yellow oil.  $^1H$  NMR ( $CDCl_3$ , 400 MHz)  $\delta$  7.28-7.22 (m, 1H), 7.15-7.14 (m, 2H), 7.08 (d,  $J$  = 7.6, 1H), 3.61 (s, 3H), 3.17 (s, 3H), 2.36 (s, 3H);  $^{13}C$  NMR ( $CDCl_3$ , 100 MHz)  $\delta$  201.5, 143.3, 138.1, 129.2, 128.1, 126.3, 122.5, 44.1, 43.1, 21.3.

### 3-Bromo-*N,N*-dimethylbenzothioamide 12<sup>3</sup>

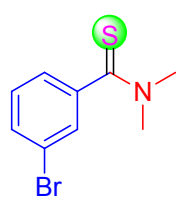

To a sealed tube were added 1-(3-bromophenyl)-*N,N,N*-trimethylmethanamonium iodide (0.1 mmol, 35.6 mg), aqueous sodium disulfide (1.3 mmol, 1.3 M, 1 mL), DMF (77  $\mu$ L, 10 equiv). The mixture was stirred at 130  $^{\circ}$ C for 12 h under  $N_2$ . 3-Bromo-*N,N*-dimethylbenzothioamide (19.8 mg, 81%) was obtained through column chromatography (PE: EA = 10: 1) as a yellow oil.  $^1H$  NMR ( $CDCl_3$ , 400 MHz)  $\delta$  7.46-7.44 (m, 2H), 7.24-7.21 (m, 2H), 3.58 (s, 3H), 3.16 (s, 3H);  $^{13}C$  NMR ( $CDCl_3$ , 100 MHz)  $\delta$  199.0, 144.9, 144.8, 131.5, 129.9, 128.6, 124.2, 44.1, 43.1.

### 3-Amino-*N,N*-dimethylbenzothioamide 13<sup>5</sup>

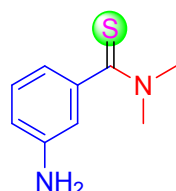

To a sealed tube were added 1-(3-Aminophenyl)-*N,N,N*-trimethylmethanaminium iodide (0.1 mmol, 29.2 mg), aqueous

sodium disulfide (1.3 mmol, 1.3 M, 1 mL), DMF (77  $\mu$ L, 10 equiv). The mixture was stirred at 130  $^{\circ}$ C for 12 h under  $N_2$ . 3-Amino-*N,N*-dimethylbenzothioamide (14.1 mg, 78%) was obtained through column chromatography (PE: EA = 2: 1) as a yellow oil.  $^1H$  NMR ( $CDCl_3$ , 400 MHz)  $\delta$  7.12-7.08 (m, 1H), 6.62-6.60 (m, 3H), 3.73 (s, 2H), 3.57 (s, 3H), 3.16 (s, 3H);  $^{13}C$  NMR ( $CDCl_3$ , 100 MHz)  $\delta$  201.4, 146.4, 144.4, 129.2, 115.4, 115.2, 112.4, 44.0, 43.0. HRMS (ESI)  $m/z$  calcd for  $C_{21}H_{15}NNaO_5(M+H)^+$  181.0794, found 181.0794.

### *N,N*-Dimethylpyridine-2-carbothioamide **14**<sup>3</sup>

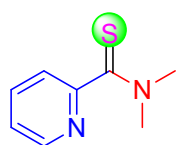

To a sealed tube were added *N,N,N*-trimethyl-1-(pyridin-2-yl)methanamonium iodide (0.1 mmol, 27.8 mg), aqueous sodium disulfide (1.3 mmol, 1.3 M, 1 mL), DMF (77  $\mu$ L, 10 equiv). The mixture was stirred at 130  $^{\circ}$ C for 12 h under  $N_2$ . *N,N*-Dimethylpyridine-2-carbothioamide (12.1 mg, 73%) was obtained through column chromatography (PE: EA = 10: 1) as a yellow oil.  $^1H$  NMR ( $CDCl_3$ , 400 MHz)  $\delta$  8.52 (d,  $J$  = 4.6 Hz, 1H), 7.74 (t,  $J$  = 8.6 Hz, 1H), 7.59 (d,  $J$  = 7.8 Hz, 1H), 7.28-7.24 (m, 1H), 3.61 (s, 3H), 3.19 (s, 3H);  $^{13}C$  NMR ( $CDCl_3$ , 100 MHz)  $\delta$  197.9, 159.4, 148.0, 136.9, 123.1, 123.1, 43.7, 43.2.

### *N,N*-Dimethylthiophene-2-carbothioamide **15**<sup>3</sup>

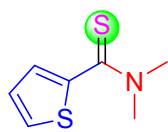

To a sealed tube were added *N,N,N*-trimethyl-1-(thiophen-2-yl)methanamonium iodide (0.1 mmol, 28.3 mg), aqueous sodium disulfide (1.3 mmol, 1.3 M, 1 mL), DMF (77  $\mu$ L, 10 equiv). The mixture was stirred at 130  $^{\circ}$ C for 12 h under  $N_2$ . *N,N*-Dimethylbenzothioamide (9.7 mg, 57%) was obtained through column chromatography (PE: EA = 10: 1) as a yellow oil.  $^1H$  NMR ( $CDCl_3$ , 400 MHz)  $\delta$  7.38 (d,  $J$  = 5.1 Hz, 1H), 7.10 (d,  $J$  = 3.6 Hz, 1H), 6.96 (t,  $J$  = 4.4 Hz, 1H), 3.56 (s, 3H), 3.42 (s, 3H);  $^{13}C$  NMR ( $CDCl_3$ , 100 MHz)  $\delta$  191.6, 145.1, 129.2, 126.4, 126.4, 44.6.

### *N,N*-Dimethyl-1*H*-pyrrole-2-carbothioamide **16**<sup>6</sup>



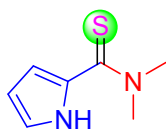

To a sealed tube were added 2-(pyrrolyl)methyltrimethylammonium iodide (0.1 mmol, 26.6 mg), aqueous sodium disulfide (1.3 mmol, 1.3 M, 1 mL), DMF (77  $\mu$ L, 10 equiv). The mixture was stirred at 130  $^{\circ}$ C for 12 h under  $N_2$ . *N,N*-Dimethyl-1*H*-pyrrole-2-carbothioamide (6.2 mg, 40%) was obtained through column chromatography (PE: EA = 10: 1) as a yellow oil.  $^1H$  NMR ( $CDCl_3$ , 300 MHz)  $\delta$  9.93 (s, 1H), 6.98-6.95 (m, 1H), 6.52-6.49 (m, 1H), 6.30-6.27 (m, 1H), 3.60 (s, 6H);  $^{13}C$  NMR ( $CDCl_3$ , 100 MHz)  $\delta$  186.7, 130.1, 122.9, 111.7, 110.5, 45.1, 44.5.

### Morpholino(phenyl)methanethione 17<sup>3</sup>

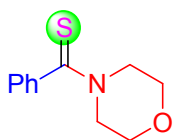

To a sealed tube were added *N,N,N*-trimethyl-1-phenylmethanamonium iodide (0.1 mmol, 27.7 mg), aqueous sodium disulfide (1.3 mmol, 1.3 M, 1 mL), morpholine-4-carbaldehyde (115.1 mg, 10 equiv). The mixture was stirred at 130  $^{\circ}$ C for 12 h under  $N_2$ . Morpholino(phenyl)methanethione (16.1 mg, 78%) was obtained through column chromatography (PE: EA = 10: 1) as a yellow solid. Mp. 137-138  $^{\circ}$ C.  $^1H$  NMR ( $CDCl_3$ , 400 MHz)  $\delta$  7.37-7.27 (m, 5H), 4.56-4.43 (m, 2H), 3.90-3.88 (m, 2H), 3.66-3.59 (m, 4H);  $^{13}C$  NMR ( $CDCl_3$ , 100 MHz)  $\delta$  201.0, 142.5, 128.8, 128.5, 125.8, 66.7, 66.5, 52.5, 49.5.

### Phenyl(piperidin-1-yl)methanethione 18<sup>3</sup>

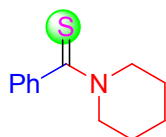

To a sealed tube were added *N,N,N*-trimethyl-1-phenylmethanamonium iodide (0.1 mmol, 27.7 mg), aqueous sodium disulfide (1.3 mmol, 1.3 M, 1 mL), piperidine-1-carbaldehyde (113.2 mg, 10 equiv). The mixture was stirred at 130  $^{\circ}$ C for 12 h under  $N_2$ . Phenyl(piperidin-1-yl)methanethione (17.4 mg, 85%) was obtained through column chromatography (PE: EA = 10: 1) as a yellow oil.  $^1H$  NMR ( $CDCl_3$ , 400 MHz)  $\delta$  7.40-7.26 (m, 5H), 4.37 (t,  $J$  = 5.5 Hz, 2H), 3.52 (t,  $J$  = 4.0 Hz, 2H), 1.86-1.80 (m, 2H), 1.78-1.72 (m, 2H), 1.60-1.54 (m, 2H);  $^{13}C$  NMR ( $CDCl_3$ , 100 MHz)  $\delta$  199.5, 143.3, 128.3, 128.3, 125.3, 53.1, 50.5, 26.8, 25.4, 24.1.

### ***N*-Cyclopentylbenzothioamide 19<sup>7</sup>**

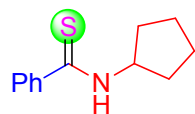

To a sealed tube were added *N,N,N*-trimethyl-1-phenylmethanamonium iodide (0.1 mmol, 27.7 mg), aqueous sodium disulfide (1.3 mmol, 1.3 M, 1 mL), *N*-cyclopentylformamide (113.2 mg, 10 equiv). The mixture was stirred at 130 °C for 12 h under N<sub>2</sub>. *N*-Cyclopentylbenzothioamide (17.0 mg, 83%) was obtained through column chromatography (PE: EA = 10: 1) as a yellow oil. <sup>1</sup>H NMR (CDCl<sub>3</sub>, 400 MHz) δ 7.70-7.68 (m, 2H), 7.53 (s, 1H), 7.46-7.35 (m, 3H), 4.92-4.84 (m, 1H), 2.26-2.19 (m, 2H), 1.77-1.56 (m, 6H); <sup>13</sup>C NMR (CDCl<sub>3</sub>, 100 MHz) δ 198.3, 142.2, 130.8, 128.4, 126.5, 57.9, 32.4, 24.1.

### ***N*-Cyclohexylbenzothioamide 20<sup>8</sup>**

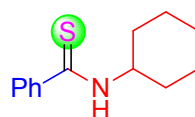

To a sealed tube were added *N,N,N*-trimethyl-1-phenylmethanaminium iodide (0.1 mmol, 27.7 mg), aqueous sodium disulfide (1.3 mmol, 1.3 M, 1 mL), *N*-cyclohexanylformamide (127.2 mg, 10 equiv). The mixture was stirred at 130 °C for 12 h under N<sub>2</sub>. *N*-Cyclohexanylbenzothioamide (19.7 mg, 90%) was obtained through column chromatography (PE: EA = 10: 1) as a yellow solid. Mp. 91-92 °C. <sup>1</sup>H NMR (CDCl<sub>3</sub>, 400 MHz) δ 7.70-7.68 (m, 2H), 7.45-7.34 (m, 4H), 4.56-4.49 (m, 1H), 2.20-2.16 (m, 2H), 1.80-1.67 (m, 3H), 1.52-1.19 (m, 5H); <sup>13</sup>C NMR (CDCl<sub>3</sub>, 100 MHz) δ 197.6, 142.3, 130.8, 128.4, 126.5, 54.8, 31.6, 25.4, 24.6.

### ***N*-phenylbenzothioamide 21<sup>9</sup>**

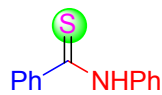

To a sealed tube were added *N,N,N*-trimethyl-1-phenylmethanamonium iodide (0.1 mmol, 27.7 mg), aqueous sodium disulfide (1.3 mmol, 1.3 M, 1 mL), *N*-phenylformamide (121.1 mg, 10 equiv). The mixture was stirred at 130 °C for 12 h under N<sub>2</sub>. *N*-Benzylbenzothioamide (16.4 mg, 77%) was obtained through column chromatography (PE: EA = 5: 1) as a yellow solid. Mp. 101-102 °C. <sup>1</sup>H NMR (CDCl<sub>3</sub>, 300 MHz) δ 9.10 (s, 1H), 7.85-7.74 (m, 4H), 7.52-7.27 (m, 6H); <sup>13</sup>C NMR (CDCl<sub>3</sub>, 100 MHz) δ 198.4, 143.1, 139.0, 131.2, 129.0, 128.6, 126.9, 126.7, 123.7.

### ***N*-Methylbenzothioamide 22<sup>10</sup>**

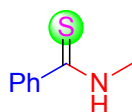

To a sealed tube were added *N,N,N*-trimethyl-1-phenylmethanamonium iodide (0.1 mmol, 27.7 mg), aqueous sodium disulfide (1.3 mmol, 1.3 M, 1 mL), *N*-cyclopentylformamide (59.1 mg, 10 equiv). The mixture was stirred at 130 °C for 12 h under N<sub>2</sub>. *N*-Methylbenzothioamide (8.0 mg, 53%) was obtained through column chromatography (PE: EA = 5: 1) as a yellow oil. <sup>1</sup>H NMR (CDCl<sub>3</sub>, 400 MHz) δ 7.86 (s, 1H), 7.71-7.69 (m, 2H), 7.45-7.41 (m, 1H), 7.36-7.33 (m, 2H), 3.29 (d, *J* = 4.9 Hz, 3H); <sup>13</sup>C NMR (CDCl<sub>3</sub>, 100 MHz) δ 200.0, 141.5, 131.0, 128.4, 126.5, 33.6.

### ***N*-Benzylbenzothioamide 23<sup>3</sup>**

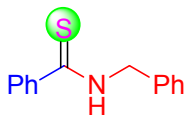

To a Schlenk tube were added *N,N,N*-trimethyl-1-phenylmethanamonium iodide (0.1 mmol, 27.7 mg), aqueous sodium disulfide (1.3 mmol, 1.3 M, 1 mL), *N*-benzylformamide (135.2 mg, 10 equiv). The mixture was stirred at 130 °C for 12 h under N<sub>2</sub>. *N*-Benzylbenzothioamide (19.1 mg, 84%) was obtained through column chromatography (PE: EA = 5: 1) as a yellow solid. Mp. 84-85 °C. <sup>1</sup>H NMR (CDCl<sub>3</sub>, 400 MHz) δ 7.82-7.73 (m, 3H), 7.47-7.42 (m, 1H), 7.40-7.33 (m, 7H), 4.98 (d, *J* = 5.2 Hz, 2H); <sup>13</sup>C NMR (CDCl<sub>3</sub>, 100 MHz) δ 199.0, 141.5, 136.1, 131.1, 128.9, 128.4, 128.3, 128.1, 126.6, 50.9.

### ***N*-Ethylbenzothioamide 24<sup>10</sup>**

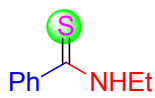

To a sealed tube were added *N,N,N*-trimethyl-1-phenylmethanamonium iodide (0.1 mmol, 27.7 mg), aqueous sodium disulfide (1.3 mmol, 1.3 M, 1 mL), *N*-benzylformamide (73.1 mg, 10 equiv). The mixture was stirred at 130 °C for 12 h under N<sub>2</sub>. *N*-Ethylbenzothioamide (14.2 mg, 86%) was obtained through column chromatography (PE: EA = 5: 1) as a yellow oil. <sup>1</sup>H NMR (CDCl<sub>3</sub>, 400 MHz) δ 7.73-7.71 (m, 2H), 7.57 (s, 1H), 7.46-7.43 (m, 1H), 7.39-7.35 (m, 2H), 3.88-3.81 (m, 2H), 1.36 (t, *J* = 7.3 Hz, 3H); <sup>13</sup>C NMR (CDCl<sub>3</sub>, 100 MHz) δ 199.0, 141.9, 130.9, 128.4, 126.5, 41.7, 13.3.

### Benzothioamide 25<sup>4</sup>

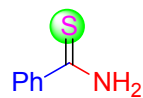

To a sealed tube were added *N,N,N*-trimethyl-1-phenylmethanamonium iodide (0.1 mmol, 27.7 mg), aqueous sodium disulfide (1.3 mmol, 1.3 M, 1 mL), formamide (45.0 mg, 10 equiv). The mixture was stirred at 130 °C for 12 h under N<sub>2</sub>. Benzothioamide (4.0 mg, 29%) was obtained through column chromatography (PE: EA = 5: 1) as a yellow solid. Mp. 115-116 °C. <sup>1</sup>H NMR (CDCl<sub>3</sub>, 400 MHz) δ 8.04 (s, 1H), 7.85 (d, *J* = 7.4 Hz, 2H), 7.51-7.48 (m, 1H), 7.40-7.37 (m, 3H); <sup>13</sup>C NMR (CDCl<sub>3</sub>, 100 MHz) δ 202.7, 139.0, 132.0, 128.4, 126.8.

### Benzaldehyde bis(morpholino) aminal 26<sup>11</sup>

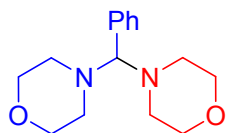

Flash column chromatography on silica gel (PE: EA = 10: 1) gave a yellow solid (8.8 mg, 43%). Mp. 101-102 °C. <sup>1</sup>H NMR (CDCl<sub>3</sub>, 400 MHz) δ 7.35-7.24 (m, 3H), 7.19-7.17 (m, 2H), 3.67-3.62 (m, 9H), 2.43-2.37 (m, 8H); <sup>13</sup>C NMR (CDCl<sub>3</sub>, 100 MHz) δ 133.8, 128.6, 127.6, 127.6, 88.9, 67.0, 49.3.

## 5. References

- 1 S. Bhattacharyya, *J. Org. Chem.*, 1995, **60**, 4928.
- 2 P. D. Kishor, J. T. Pawan, S. S. Rekha and M. B. Bhalchandra, *Green Chem. Lett. Rev.*, 2011, **4**, 151.
- 3 J. -P. Wei, Y. -M. Li and X. -F. Jiang, *Org. Lett.*, 2016, **18**, 340.
- 4 Y. -Y. Qu, Z. -K. Li, H. -F. Xiang and X. -G. Zhou, *Adv. Synth. Catal.*, 2013, **355**, 3141.
- 5 S. Kumar, R. Vanjari, T. Guntreddi and K. N. Singh, *Tetrahedron*, 2016, **72**, 2012.
- 6 M. Nonoyama and K. Nonoyama, *Synth. React. Inorg. Met.-Org. Chem.*, 1995, **25**, 569.
- 7 M. R. Kanyonyo, A. Gozzo, D. M. Lambert, D. Lesieur and H. Jacques, *Bull. Soc. Chim. Belg.*, 1997, **106**, 39.
- 8 T. Guntreddi, R. Vanjari and K. H. Singh, *Org. Lett.*, 2014, **16**, 3624.
- 9 N. Xu, X.-J. Jin, K. Suzuki, K. Yamaguchi and N. Mizuno, *New J. Chem.*, 2016, **40**, 4865.
- 10 H.-Z. Li, W.-J. Xue, G.-D. Yin and A.-X. Wu, *Tetrahedron Lett.*, 2015, **56**, 5843.
- 11 N. Sakai, H. Hori, Y. Yoshida, T. Konakahara and Y. Ogiwara, *Tetrahedron*, 2015, **71**, 4722.

## 6. Copies of the $^1\text{H}$ NMR and $^{13}\text{C}$ NMR Spectra

### Compound 4:

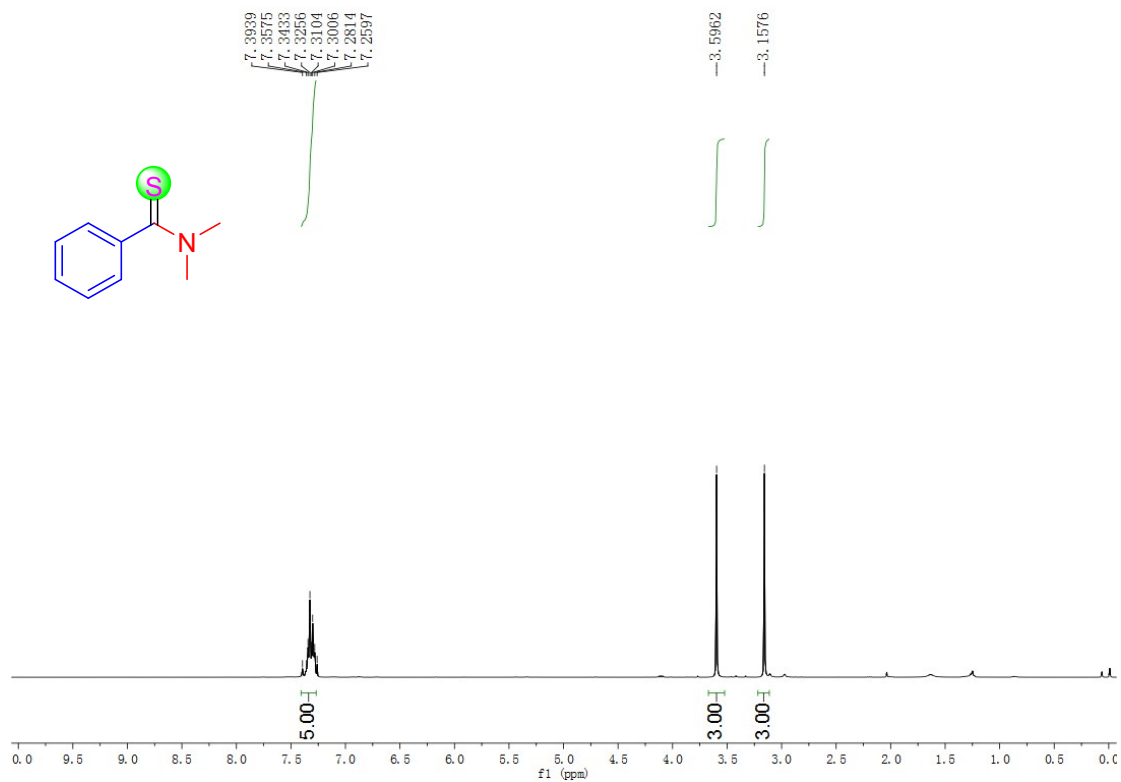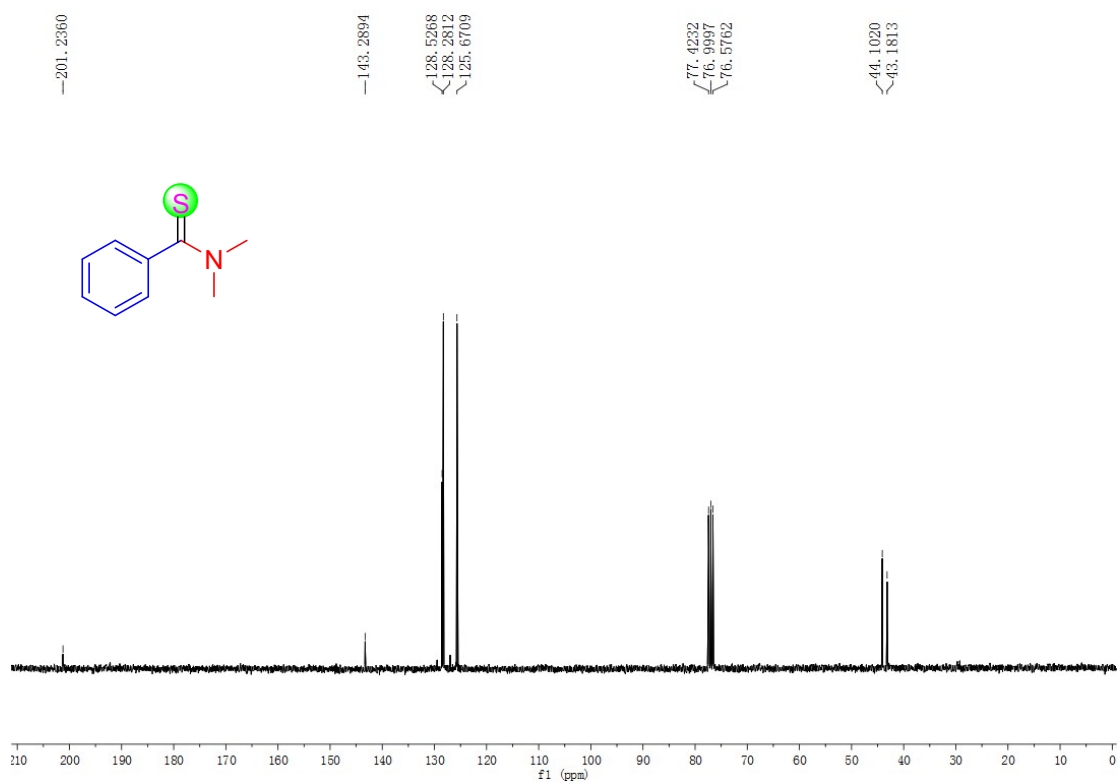

**Compound 5:**

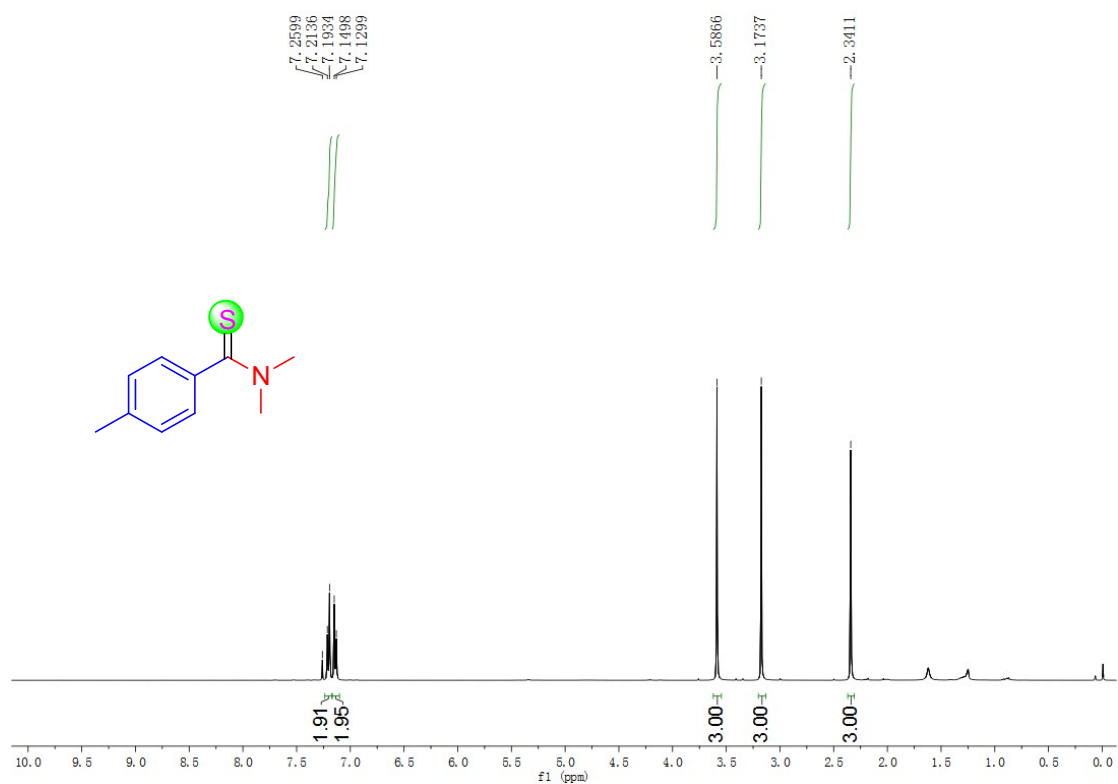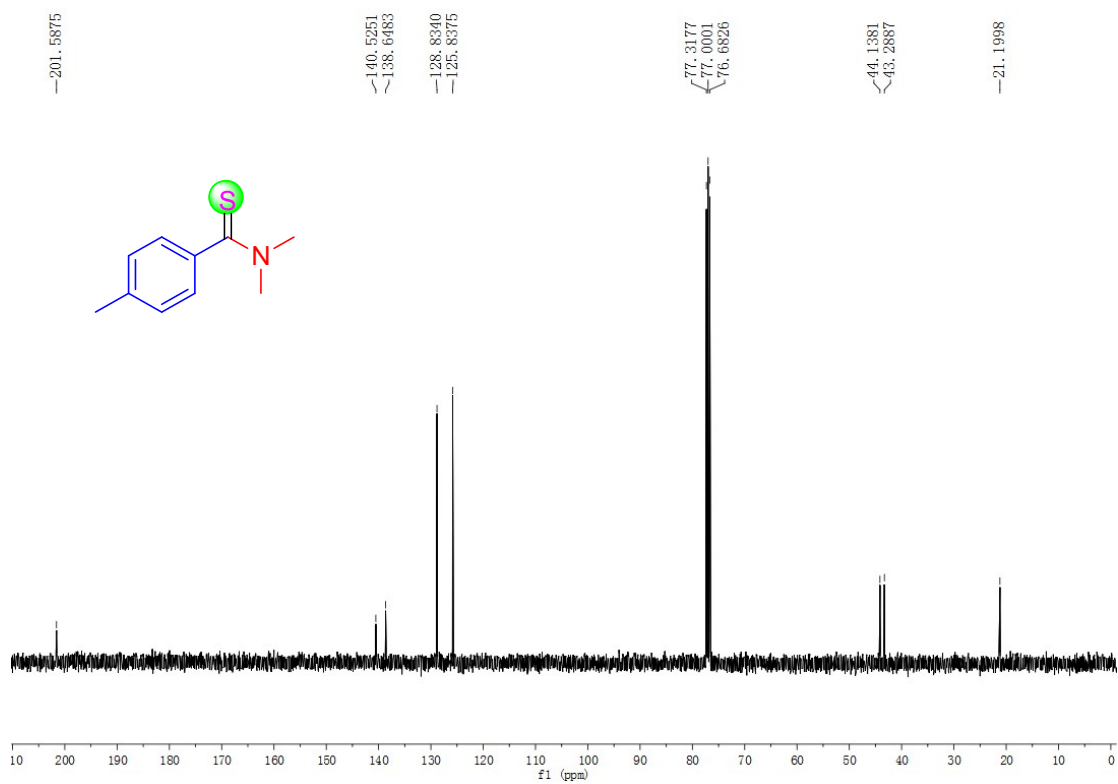

**Compound 6:**

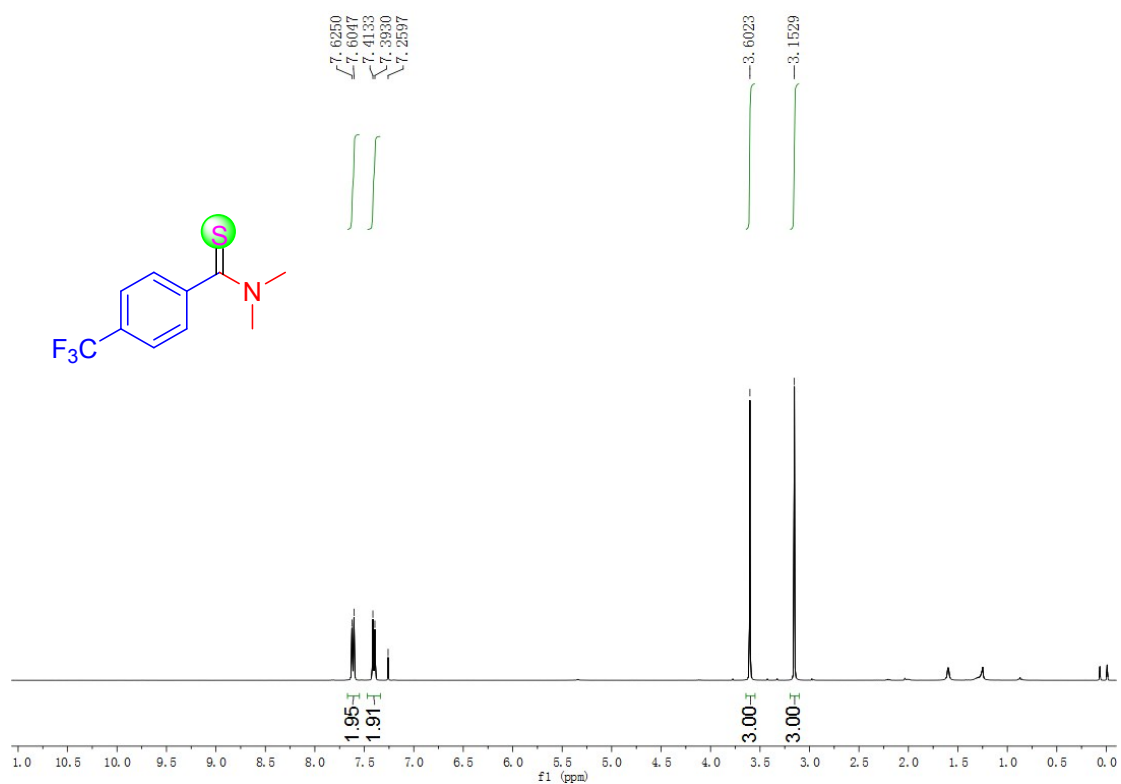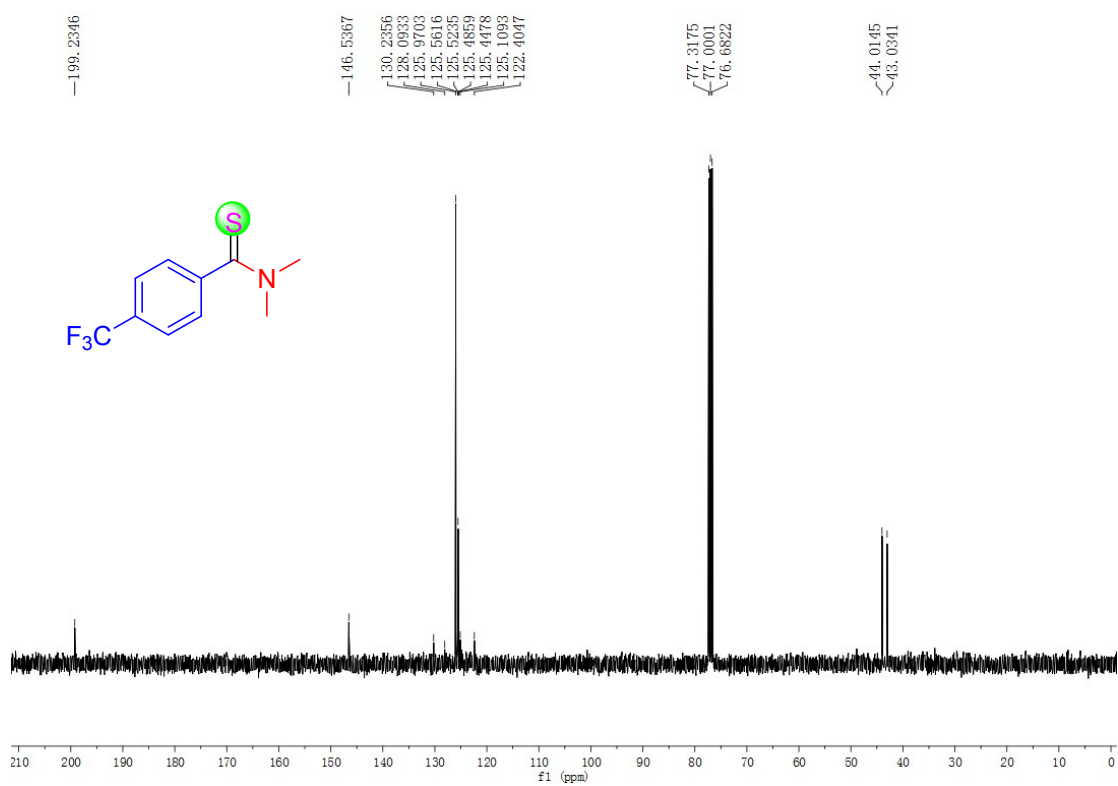



**Compound 7:**

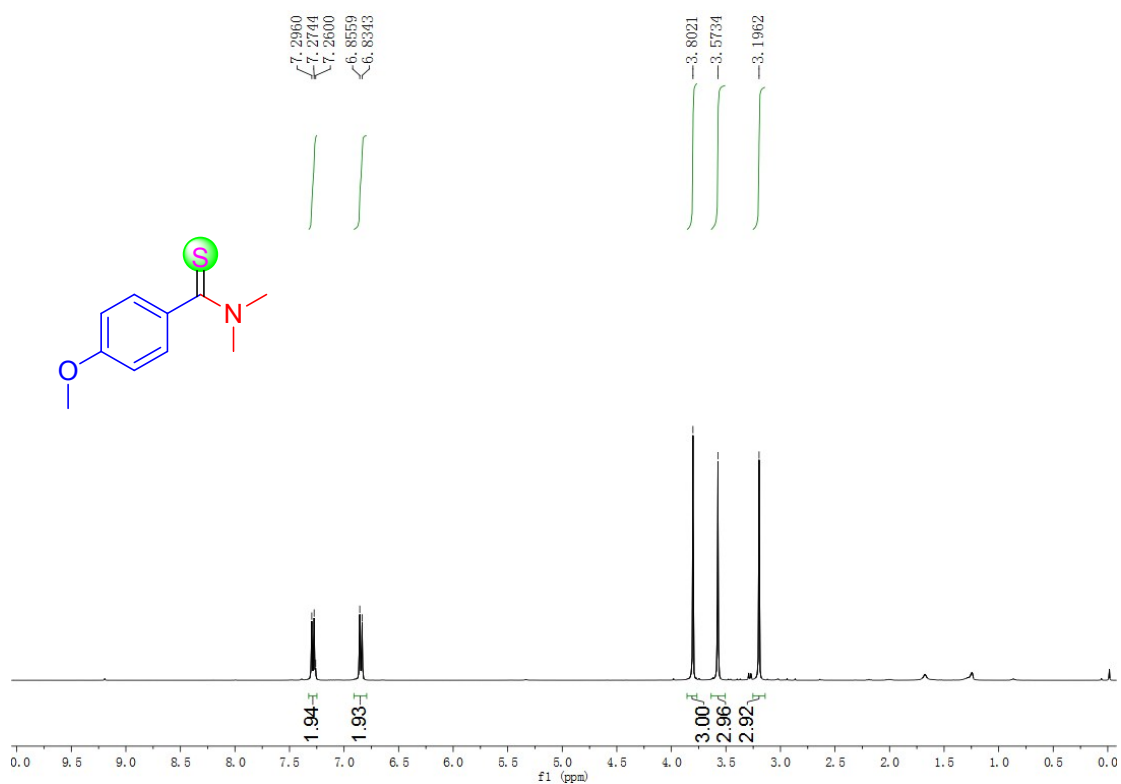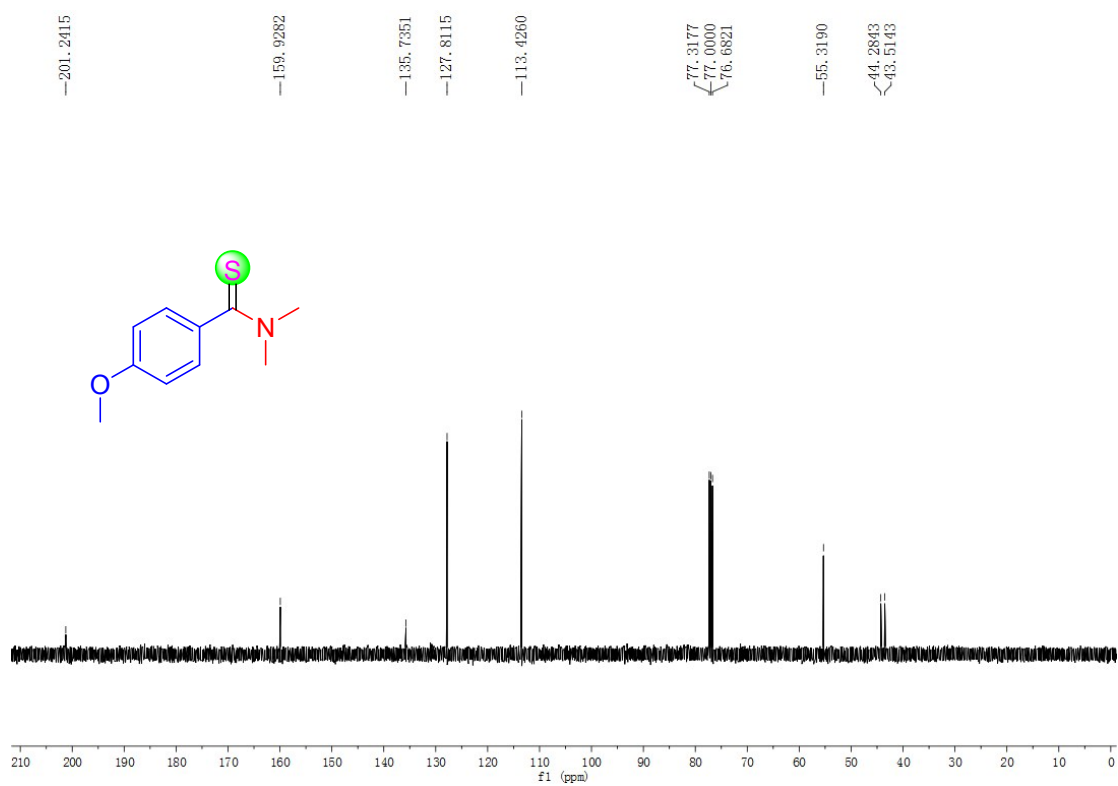

**Compound 8:**

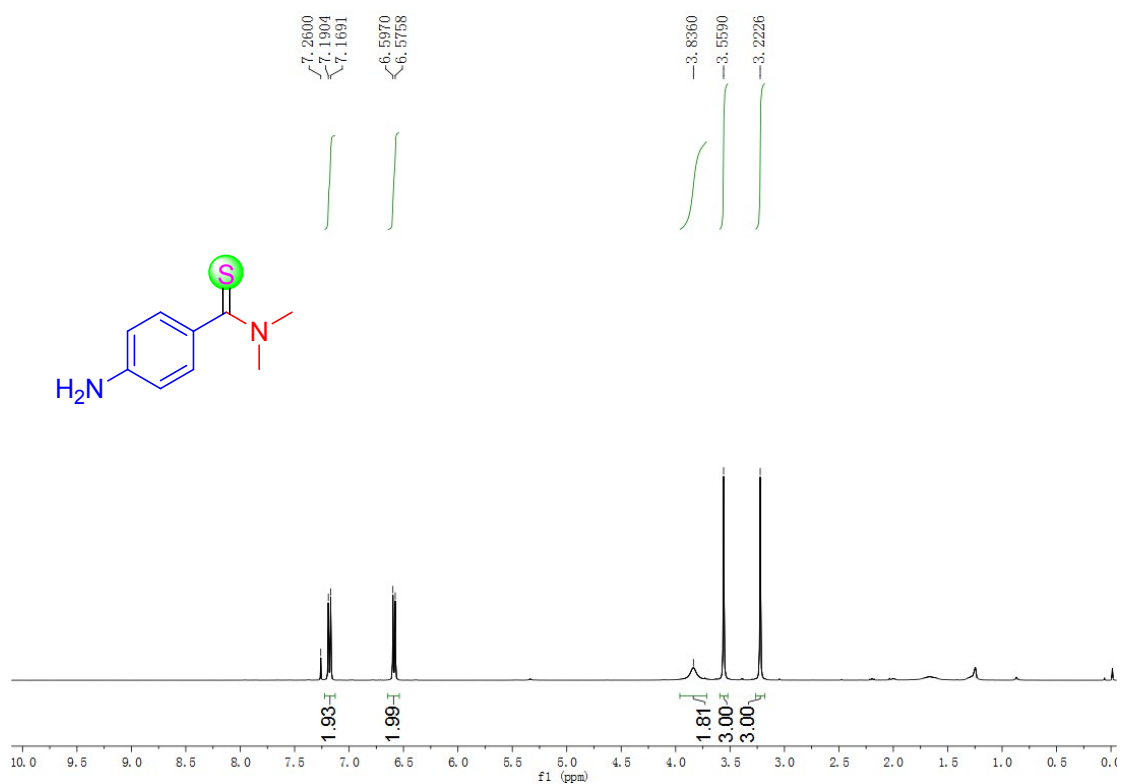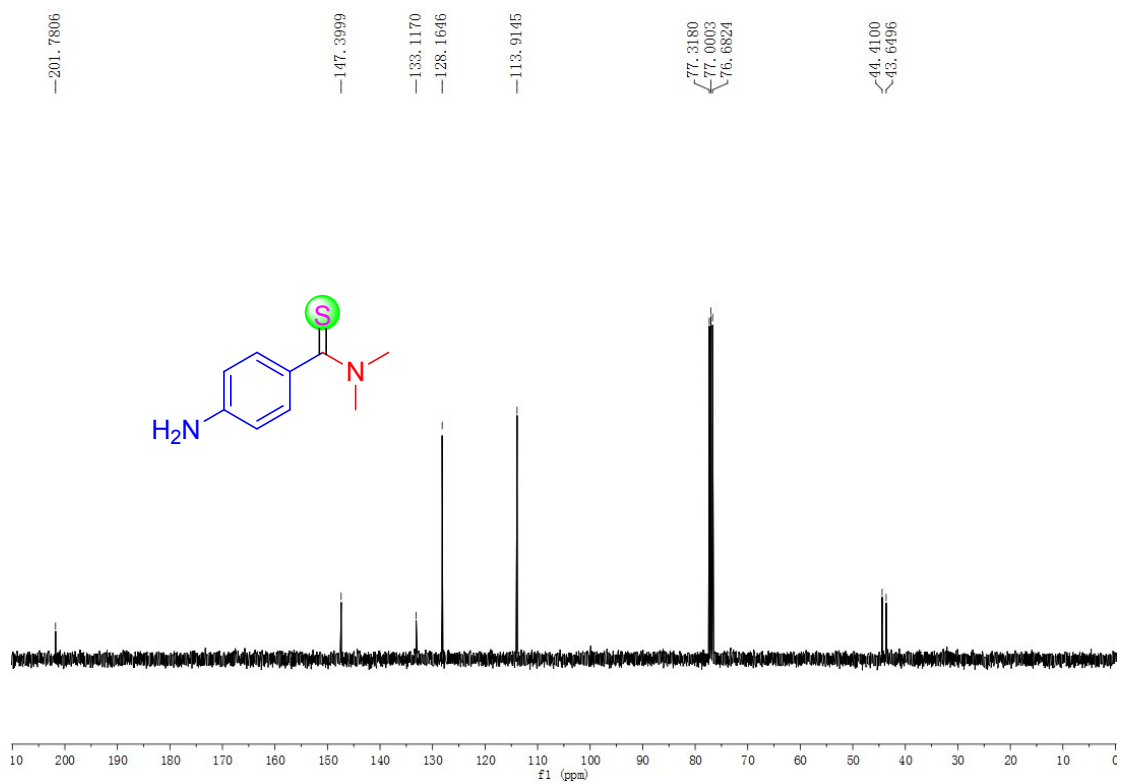

**Compound 9:**

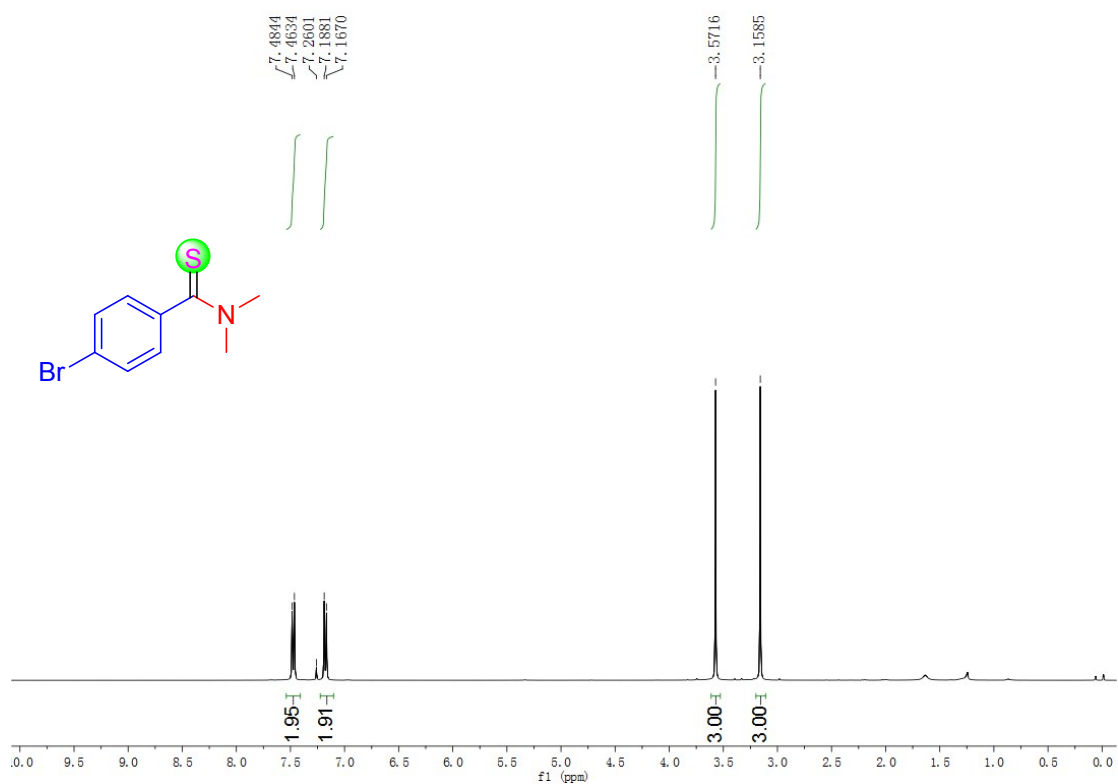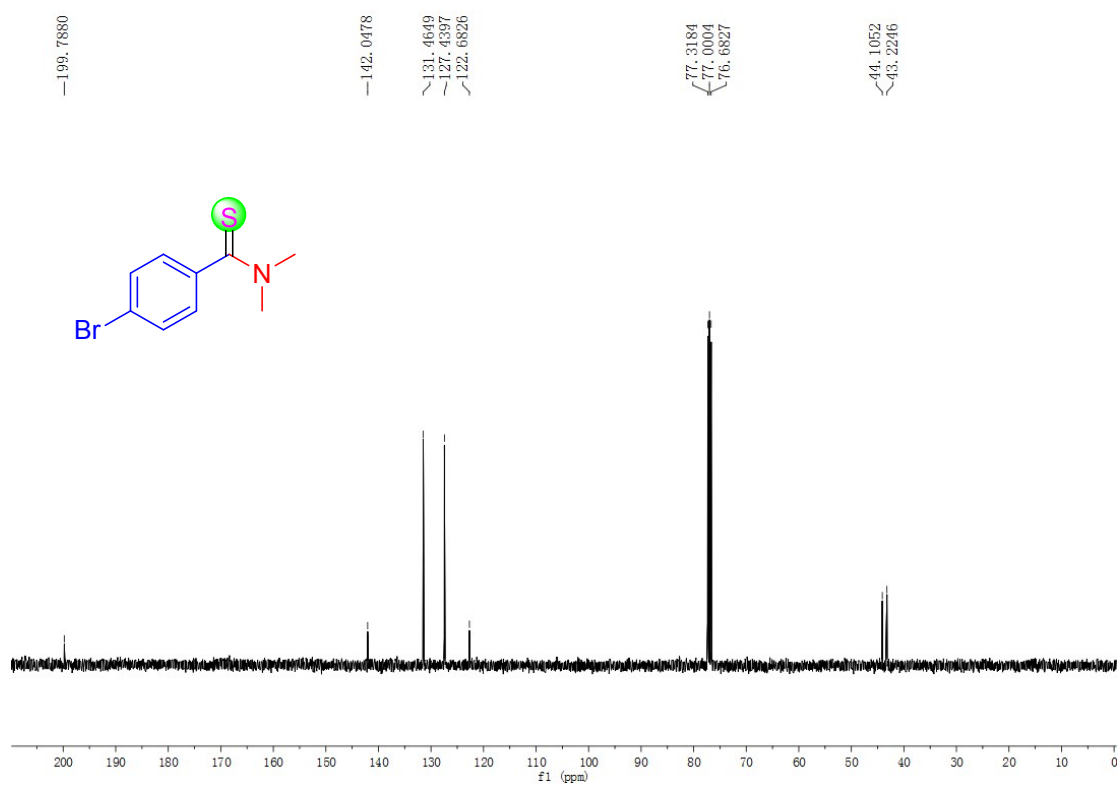

**Compound 10:**

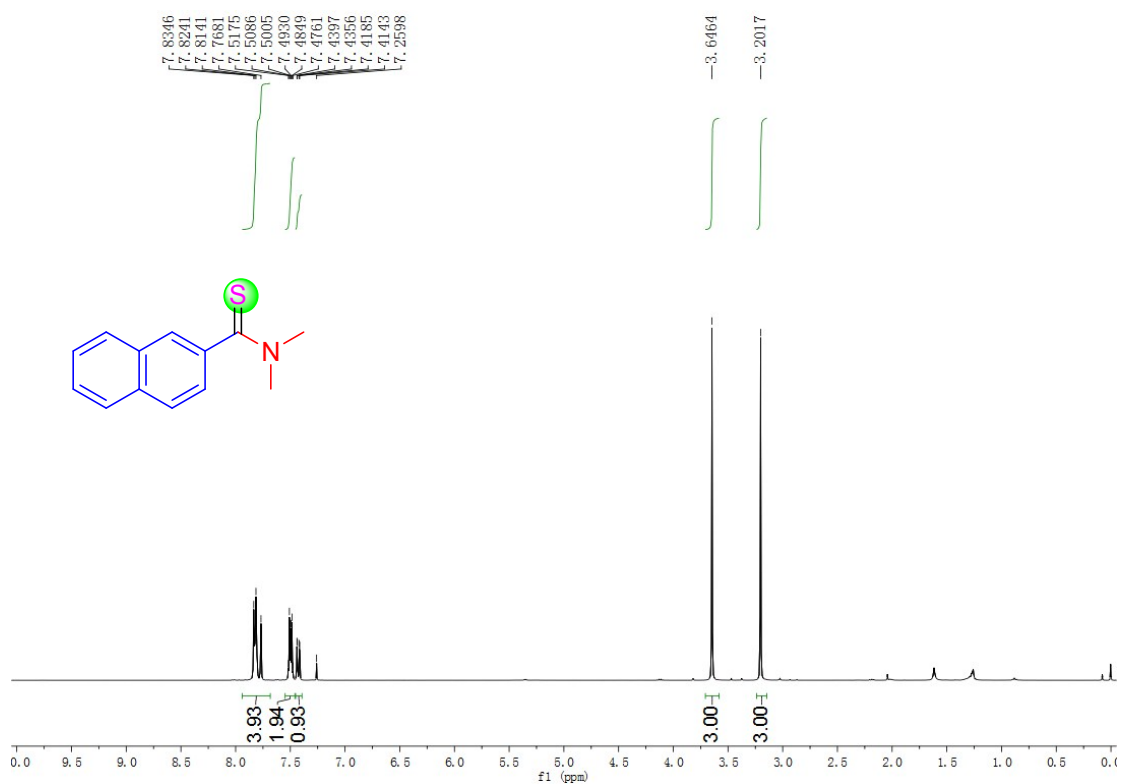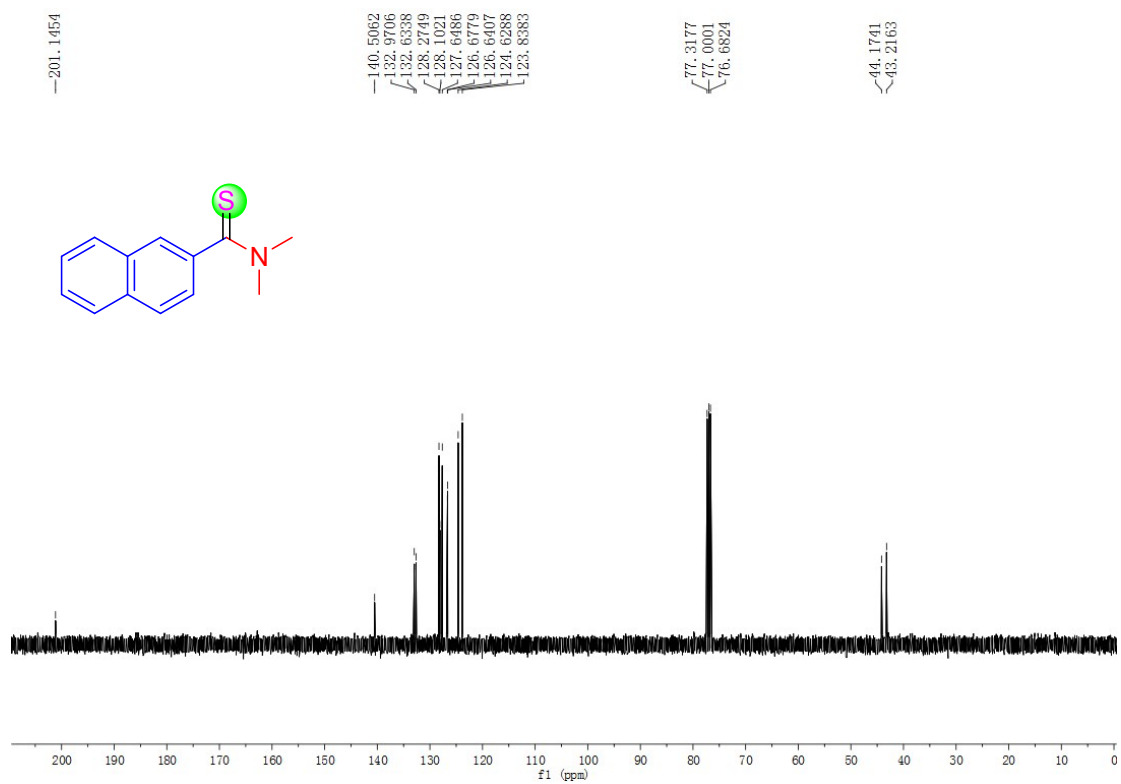

**Compound 11:**

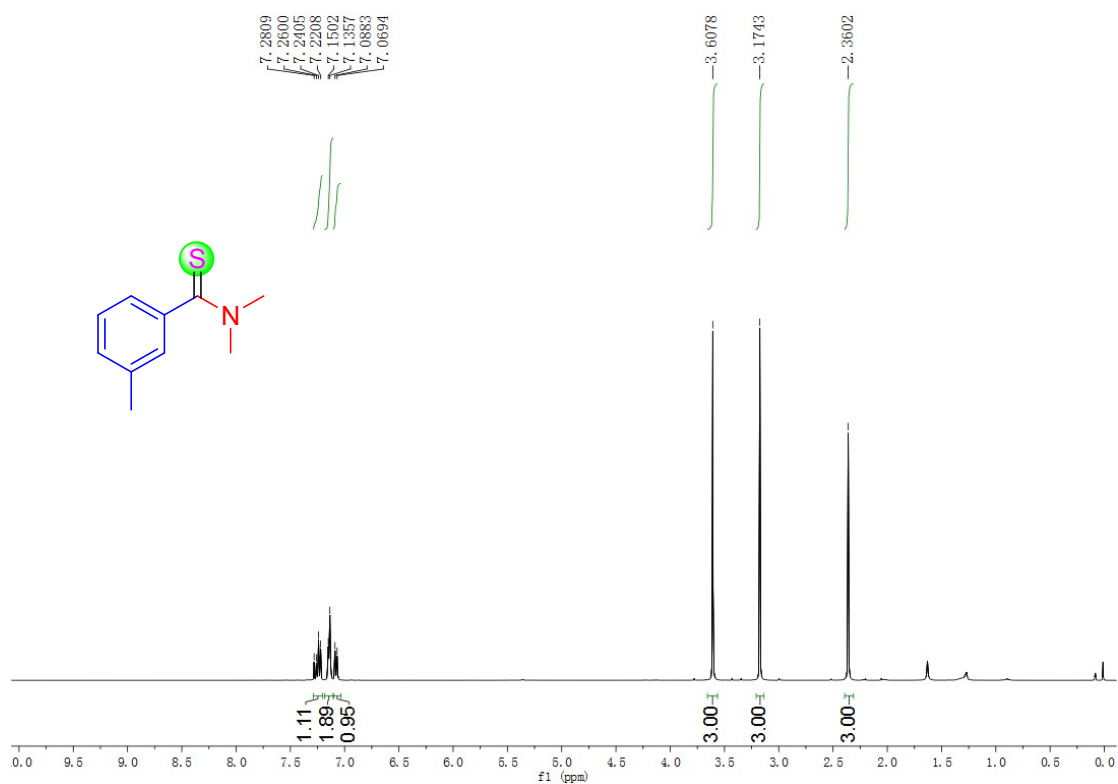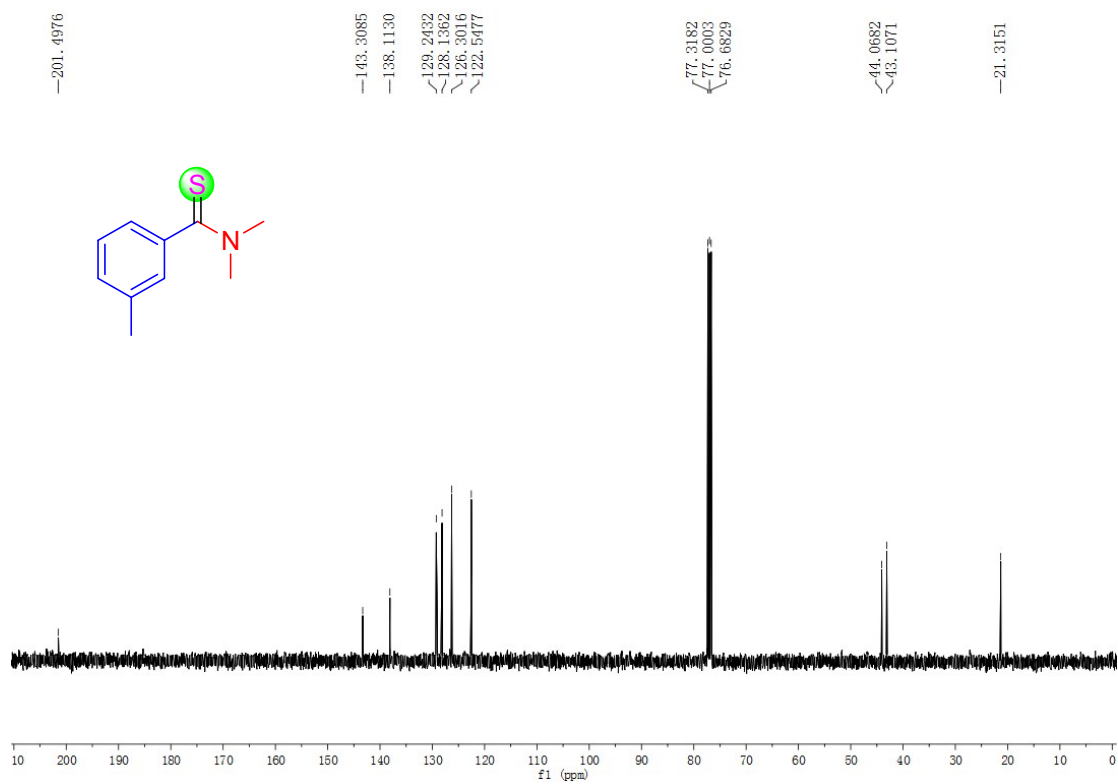

**Compound 12:**

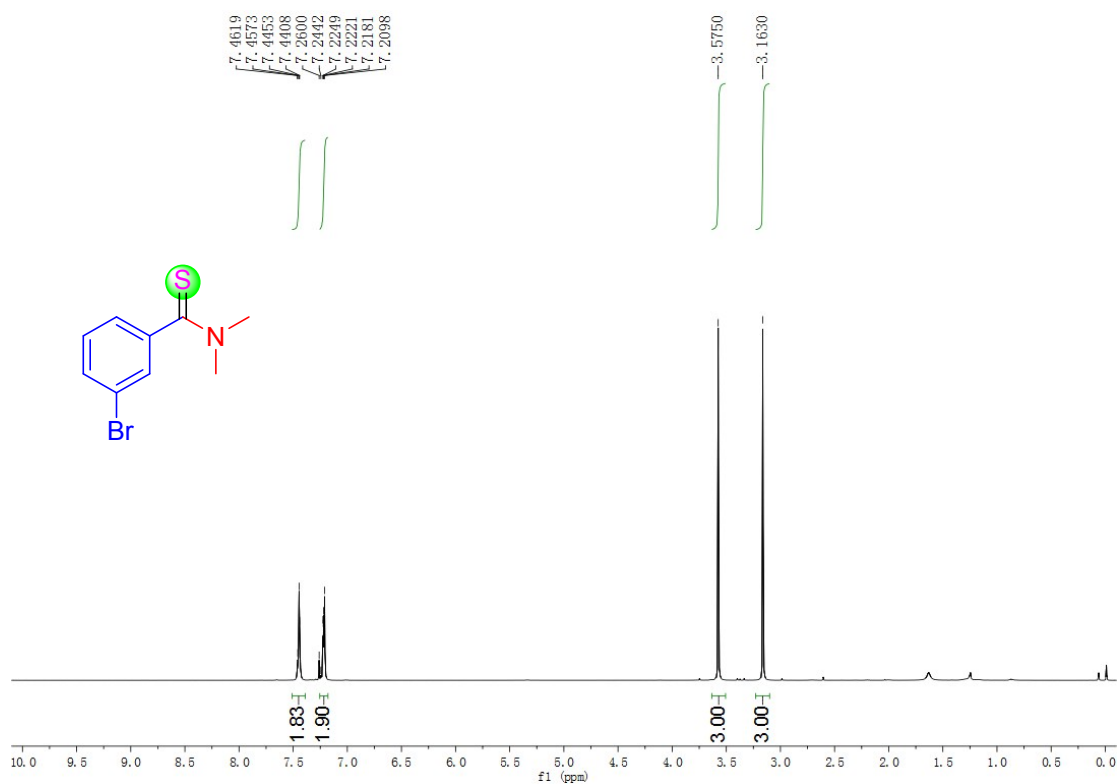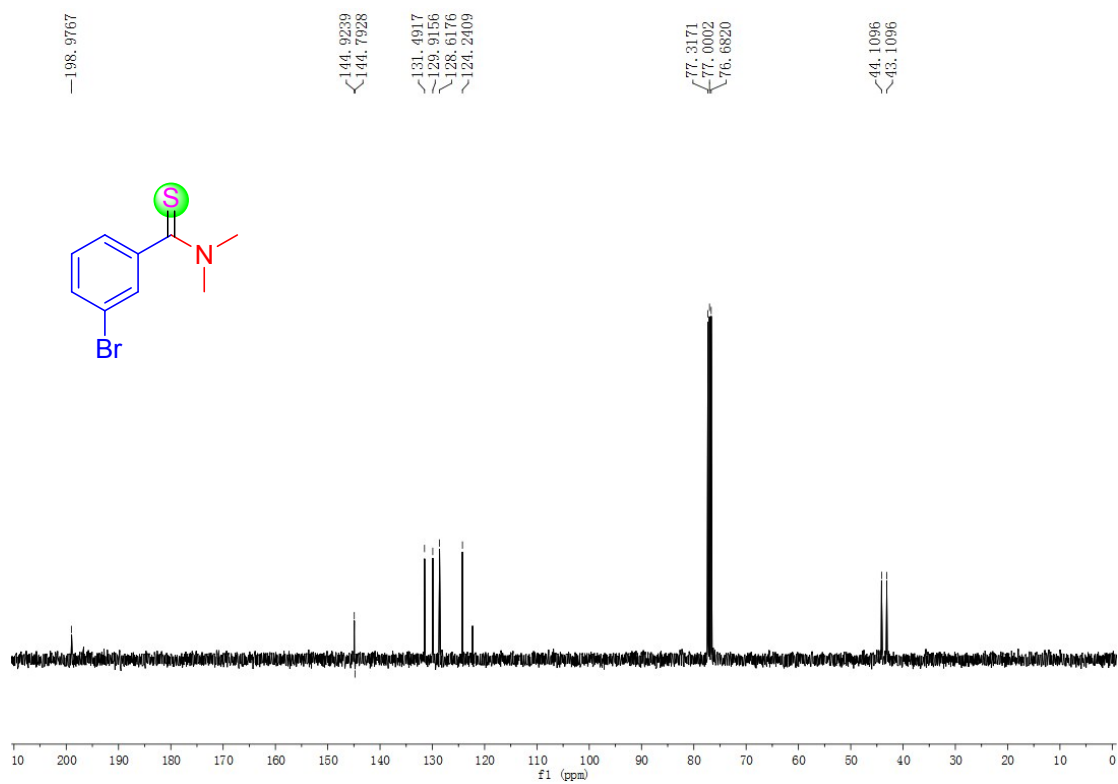

**Compound 13:**

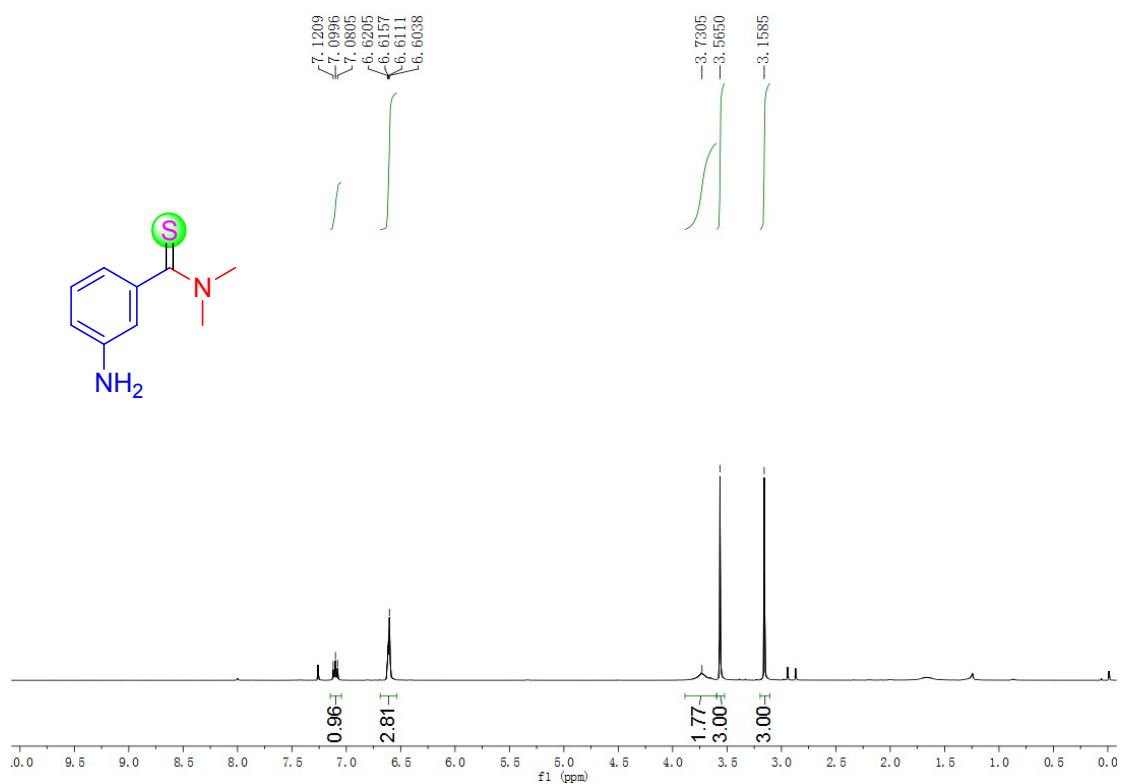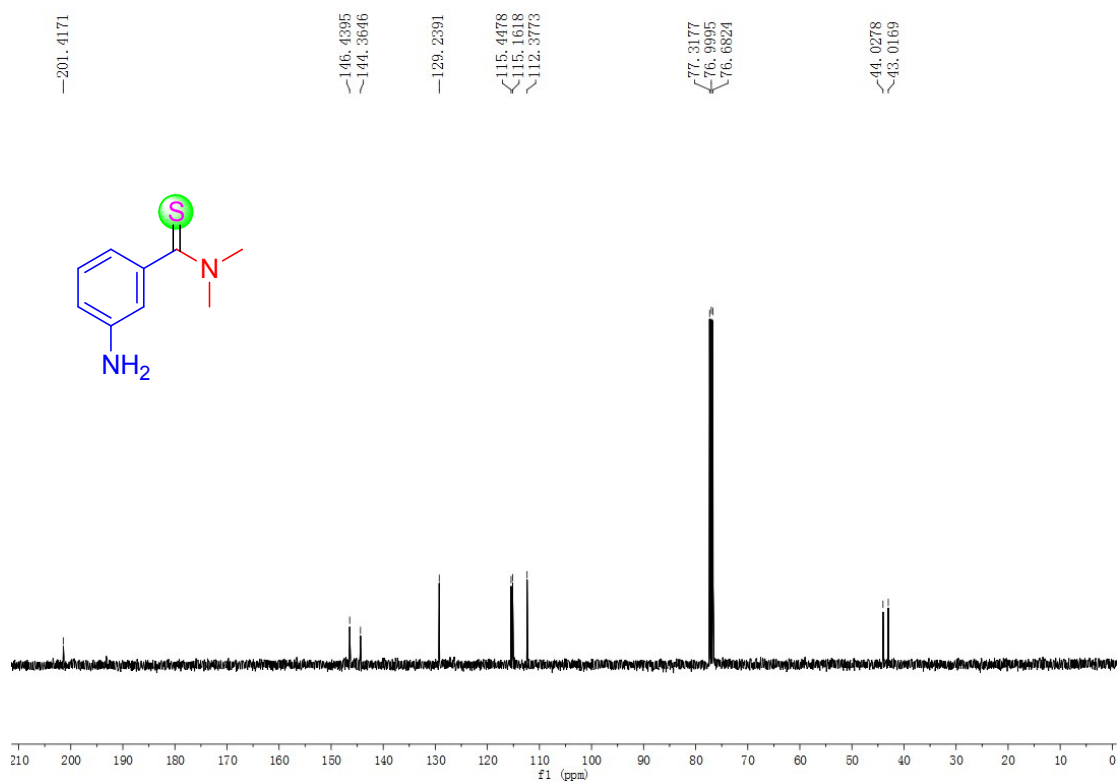

**Compound 14:**

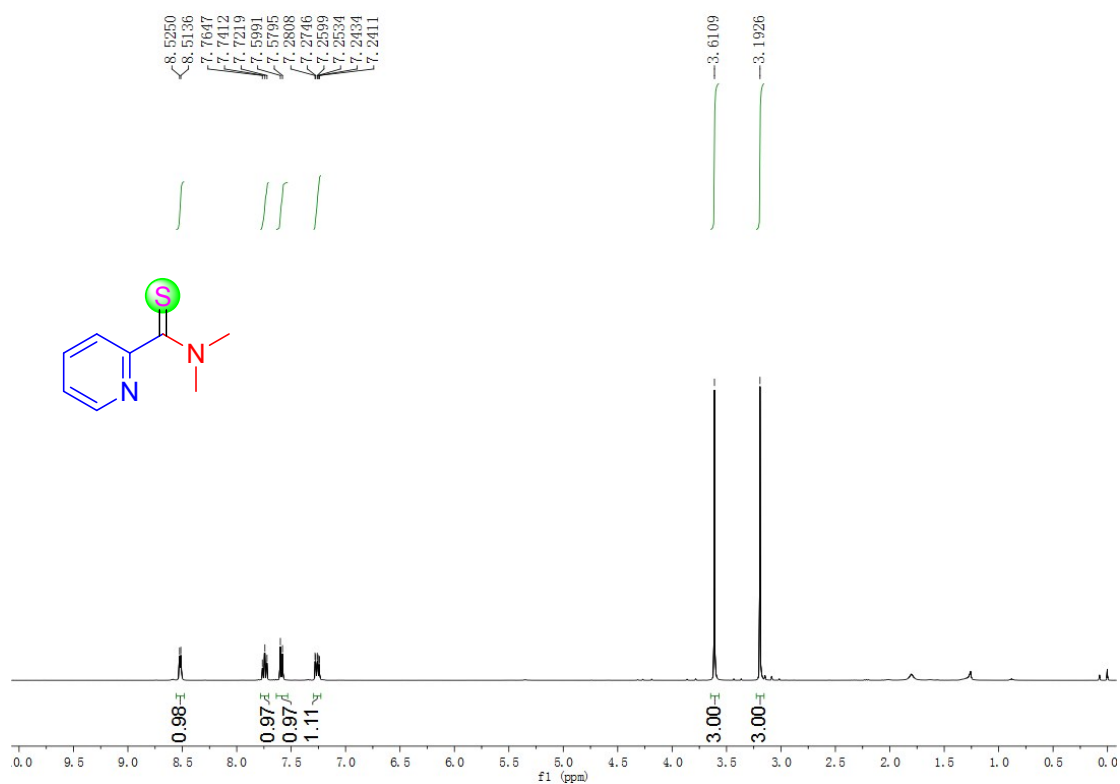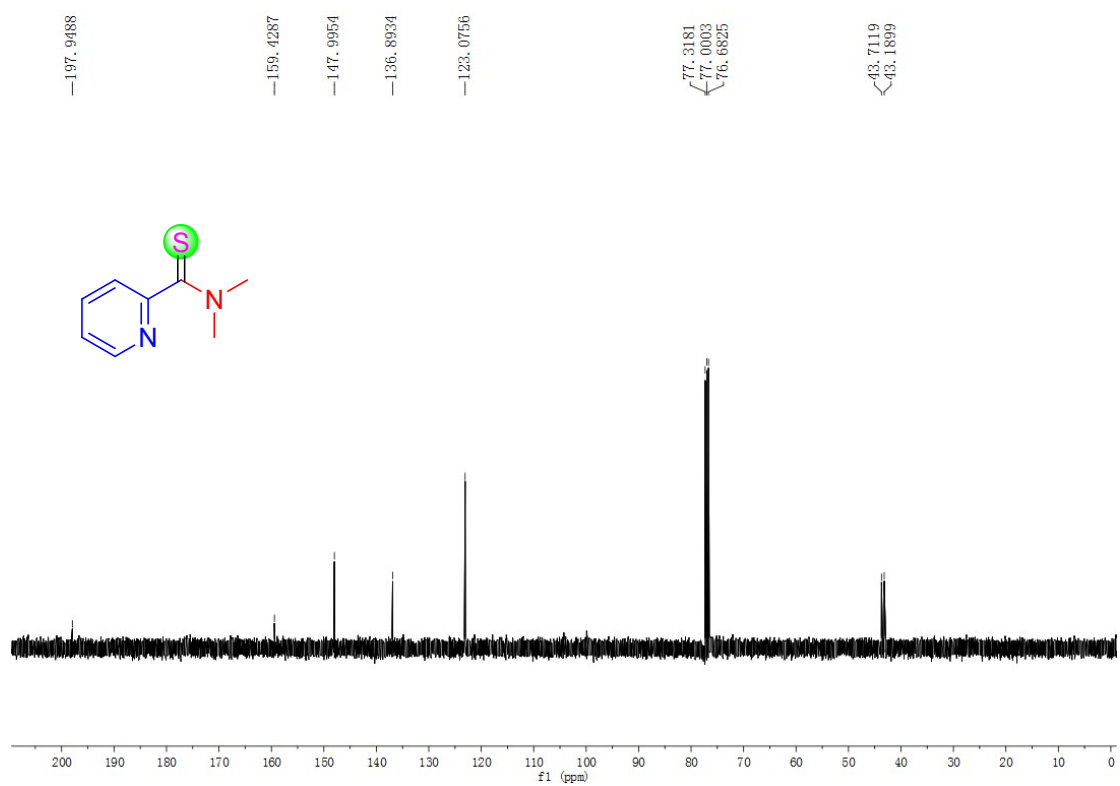



**Compound 15:**

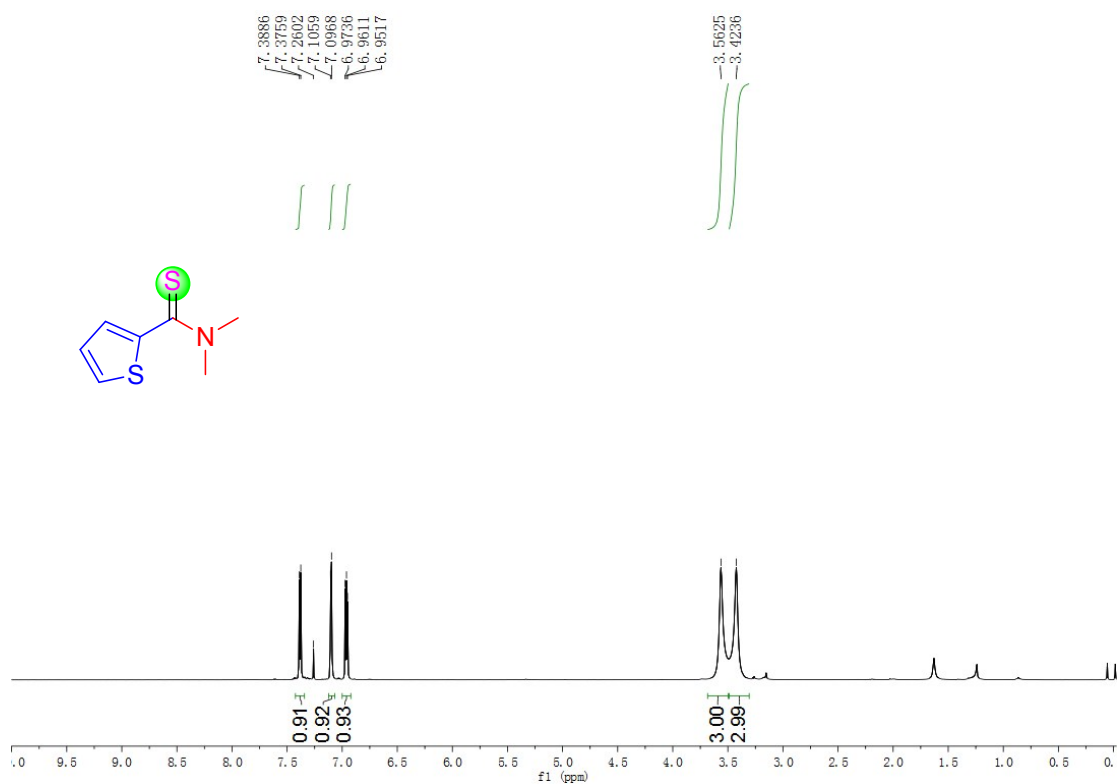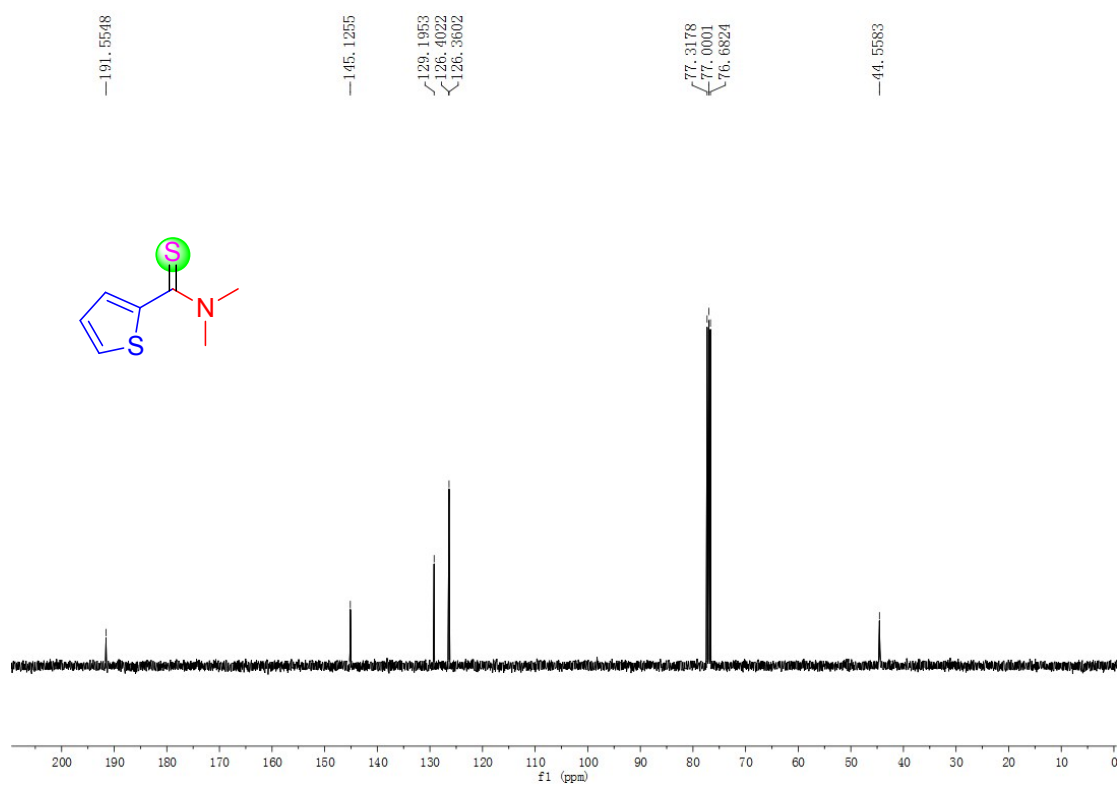

**Compound 16:**

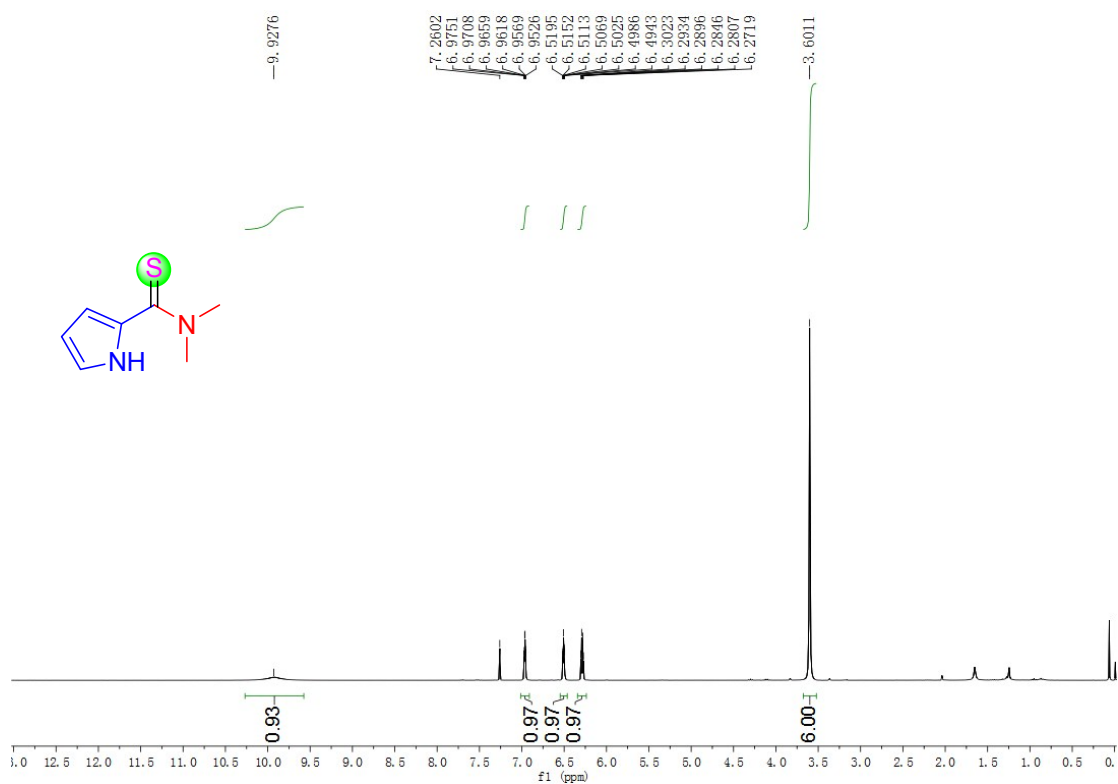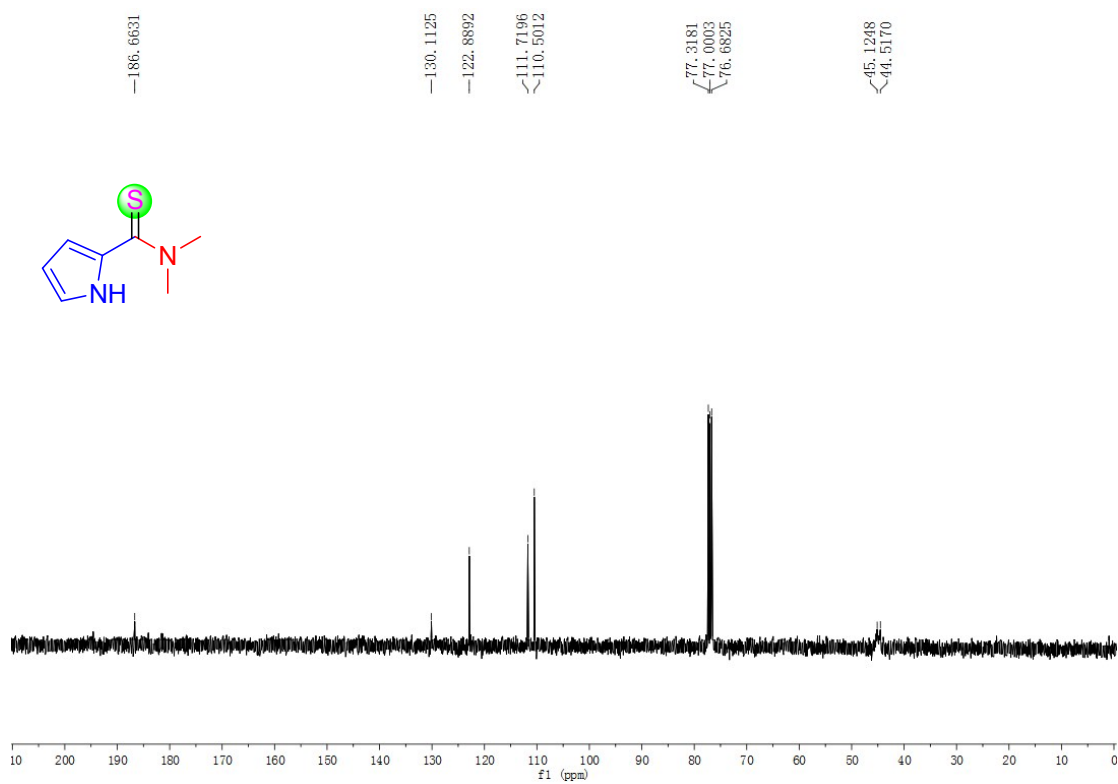

**Compound 17:**

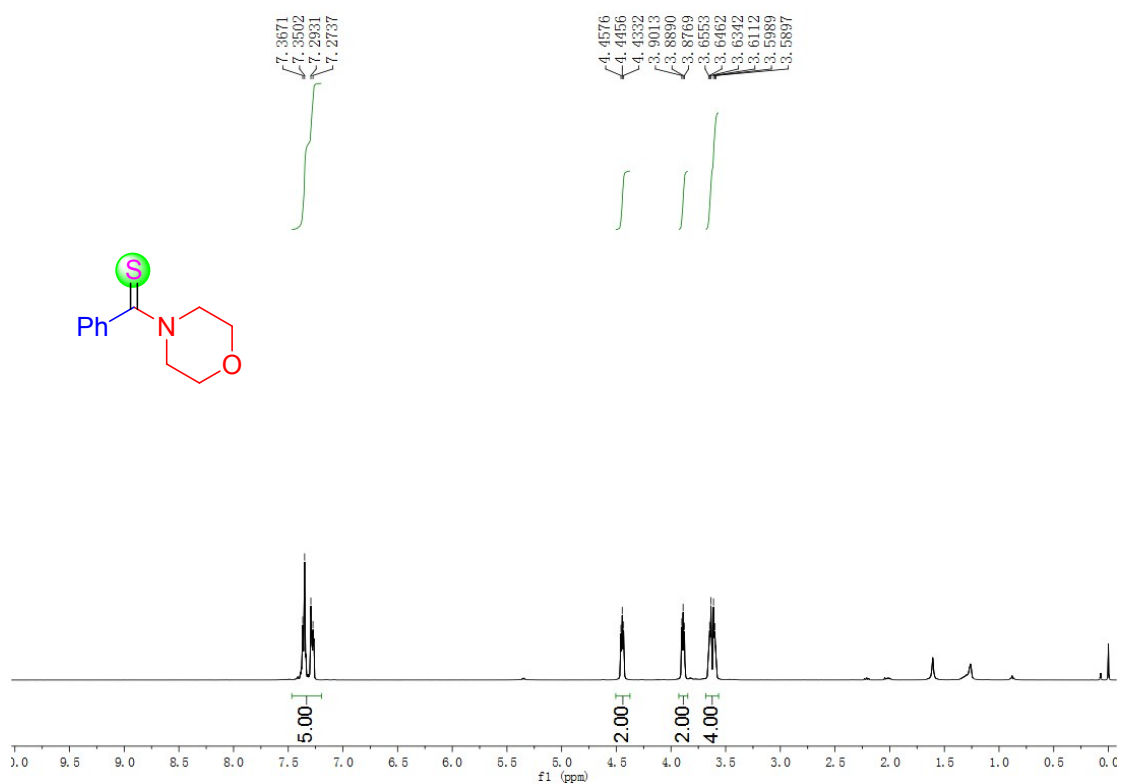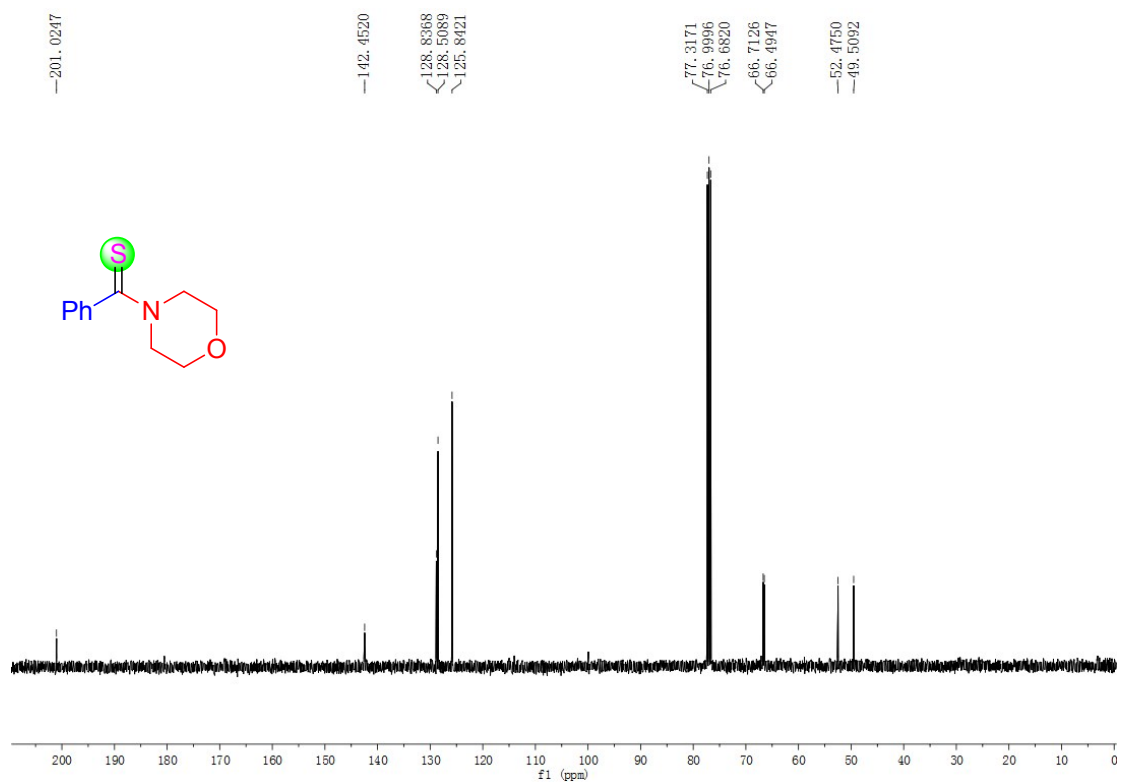

**Compound 18:**

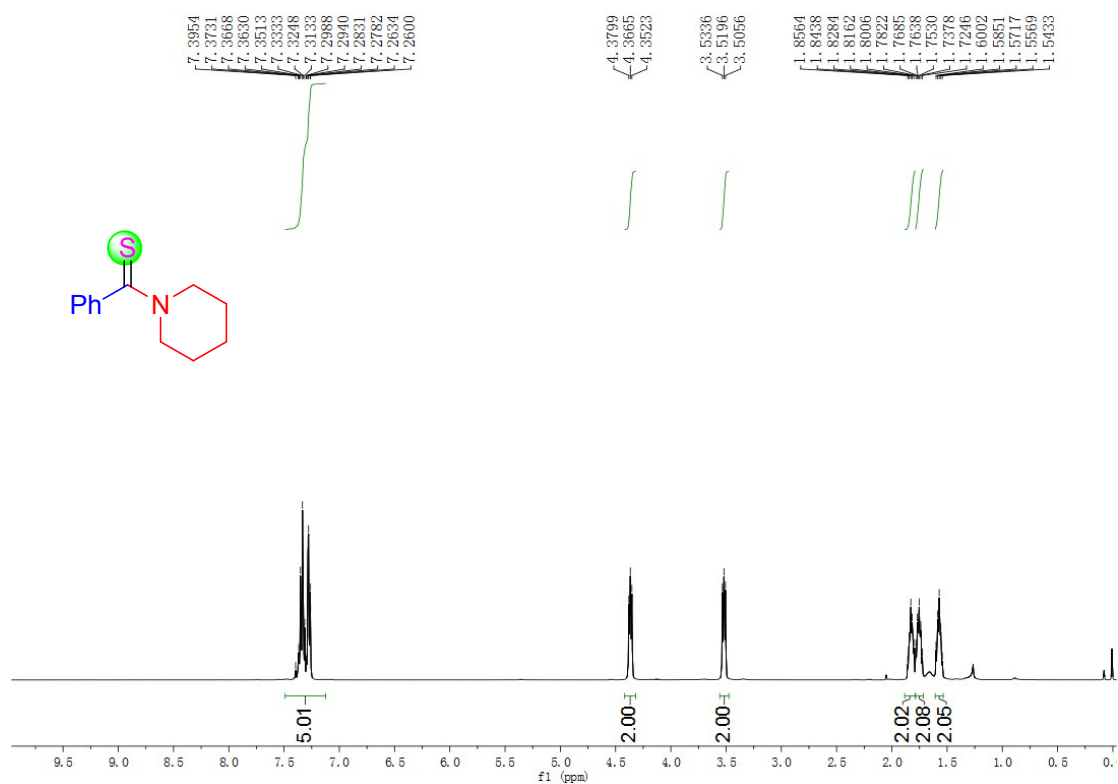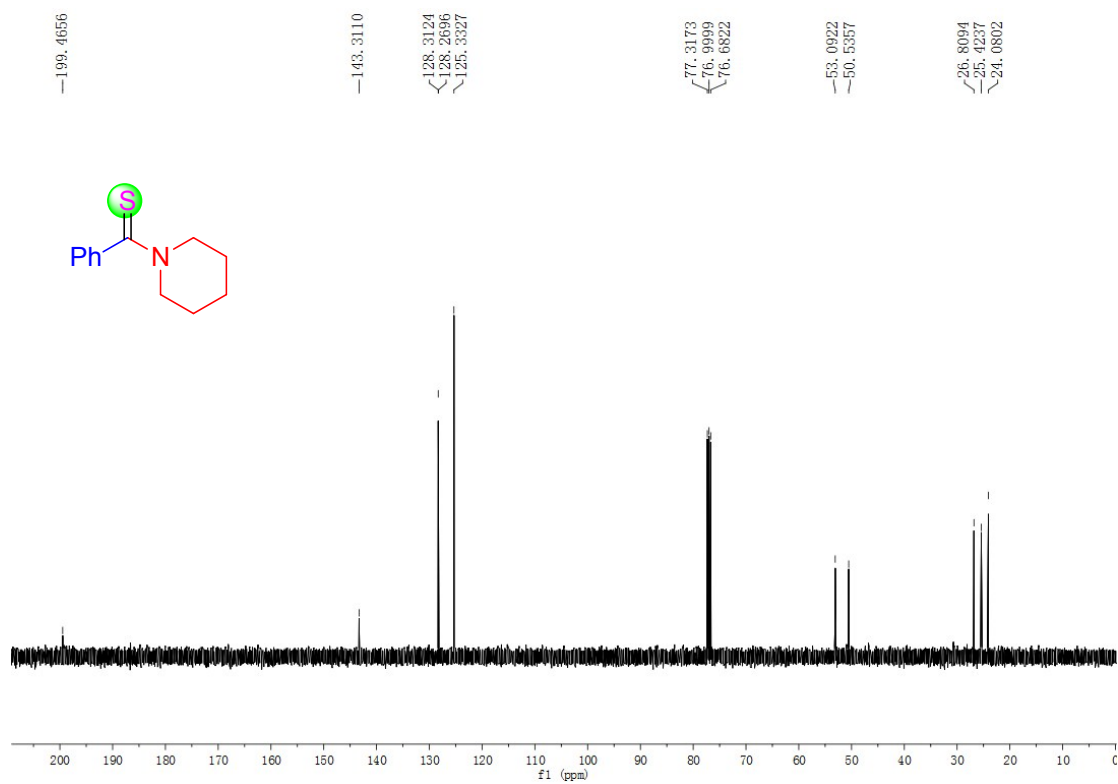

**Compound 19:**

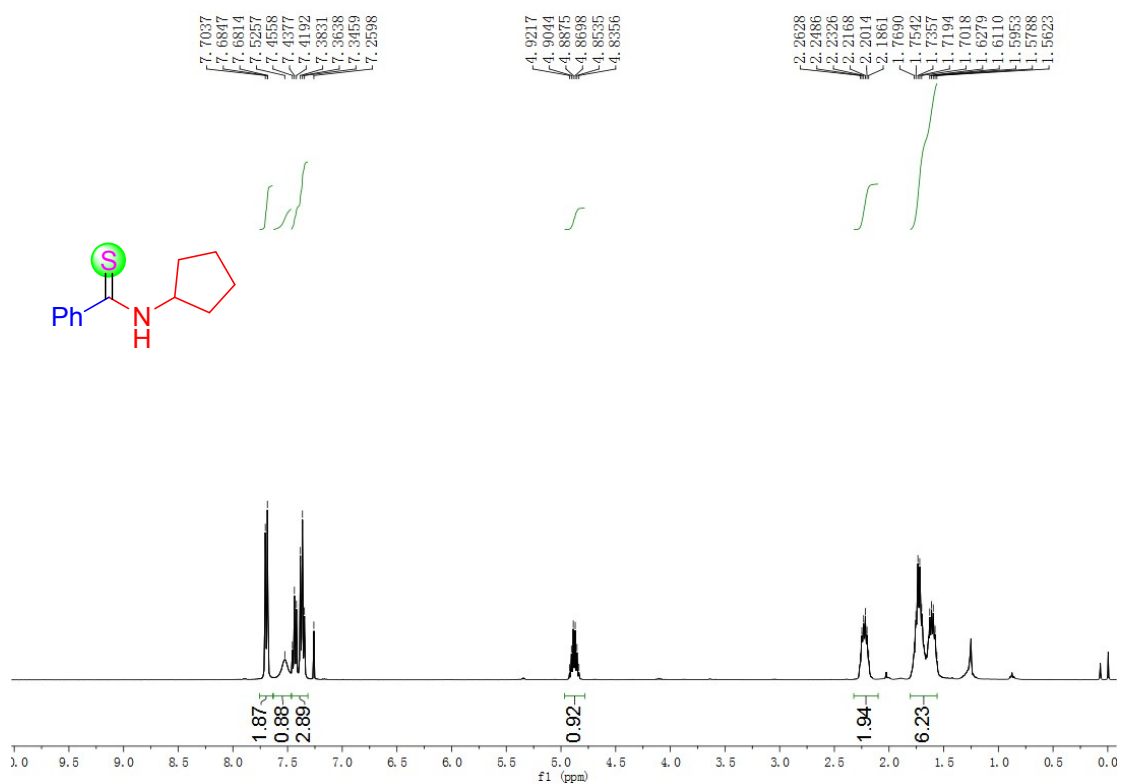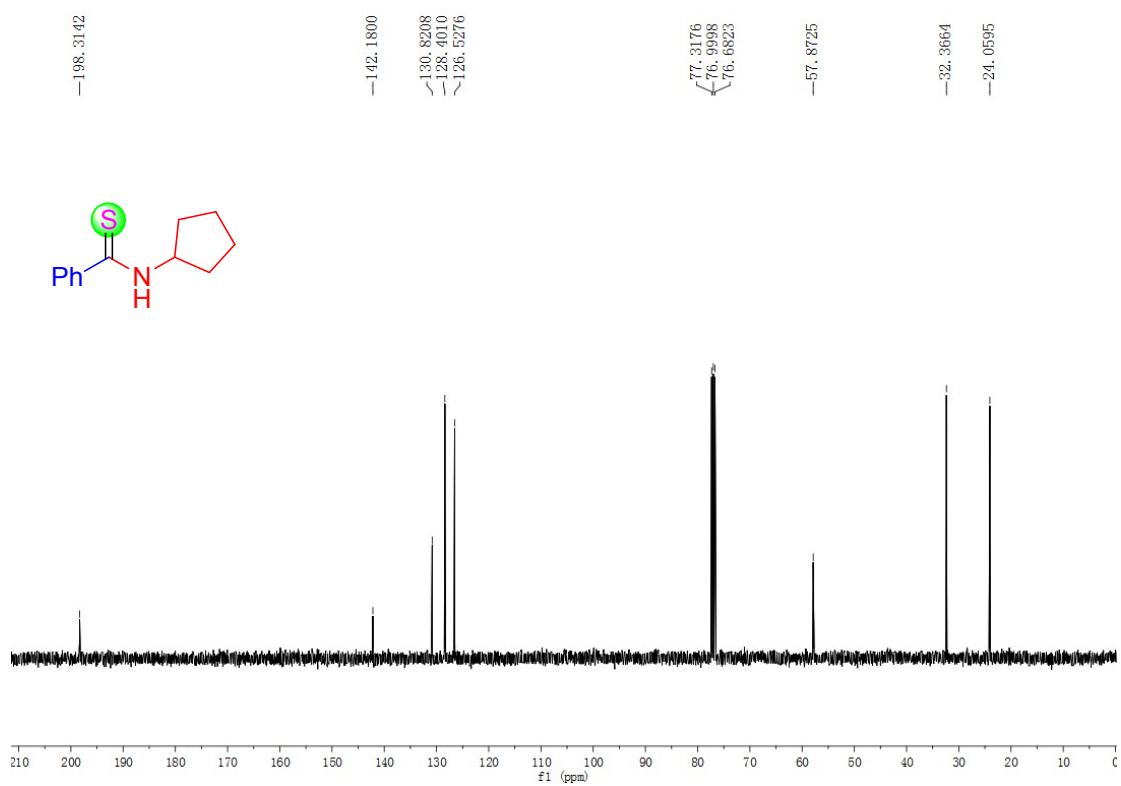

**Compound 20:**

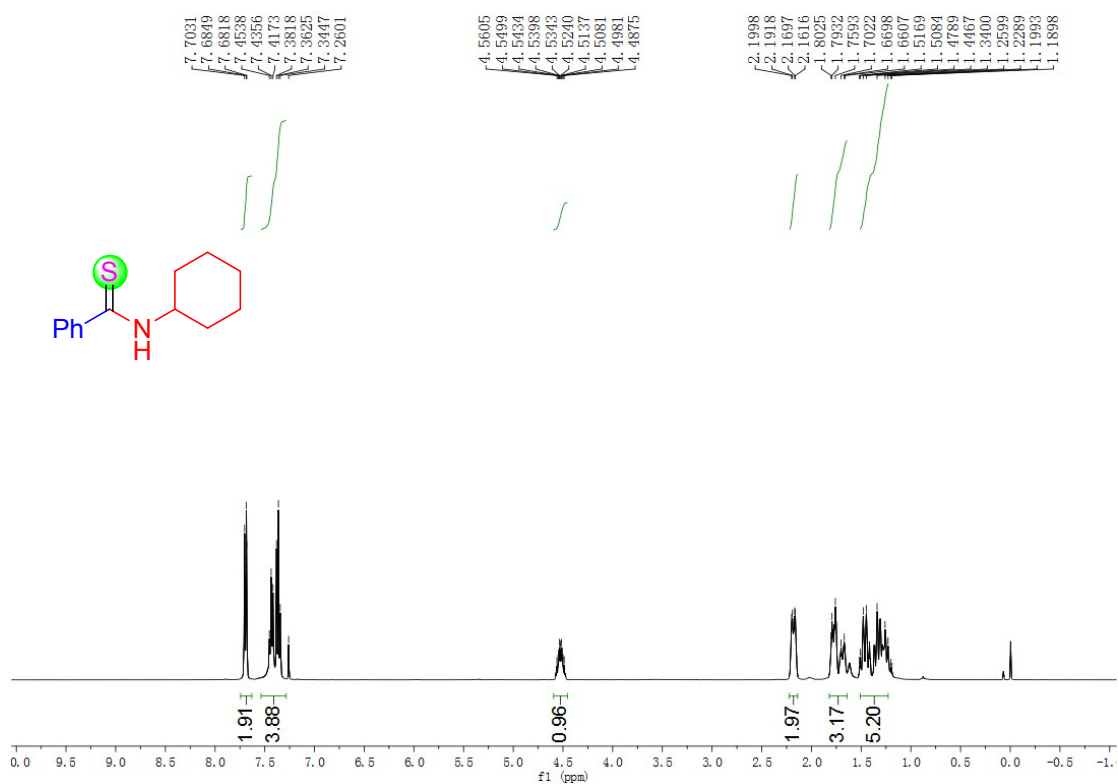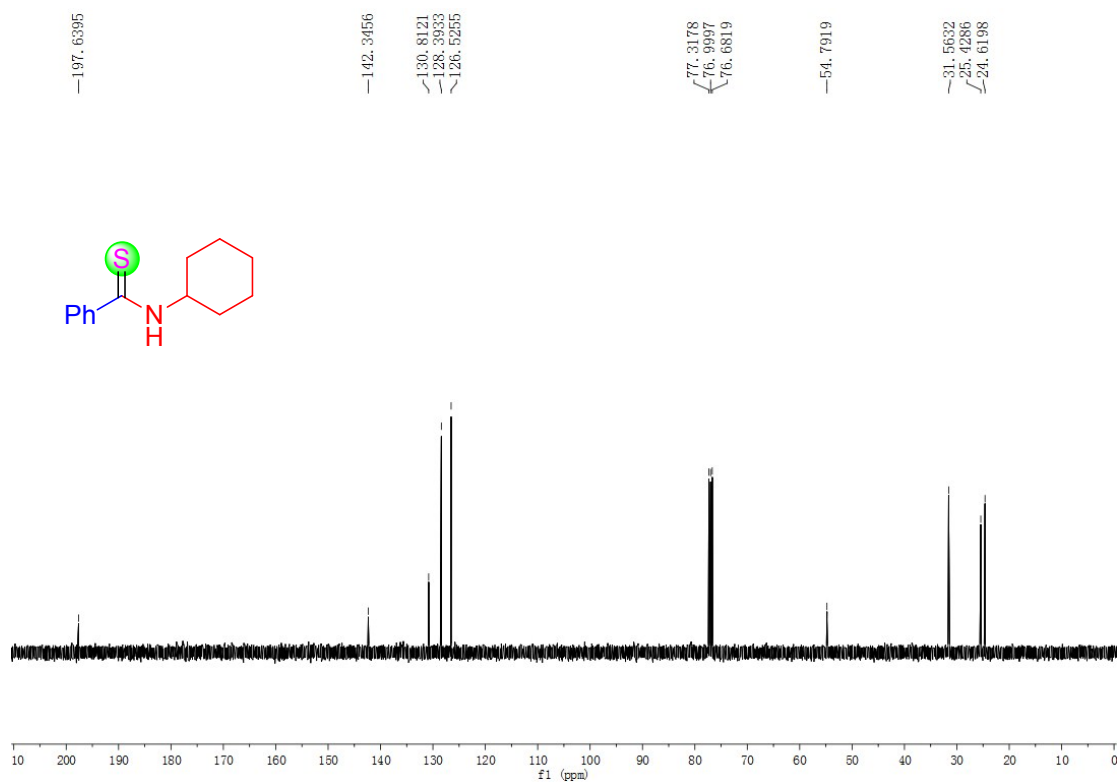

**Compound 21:**

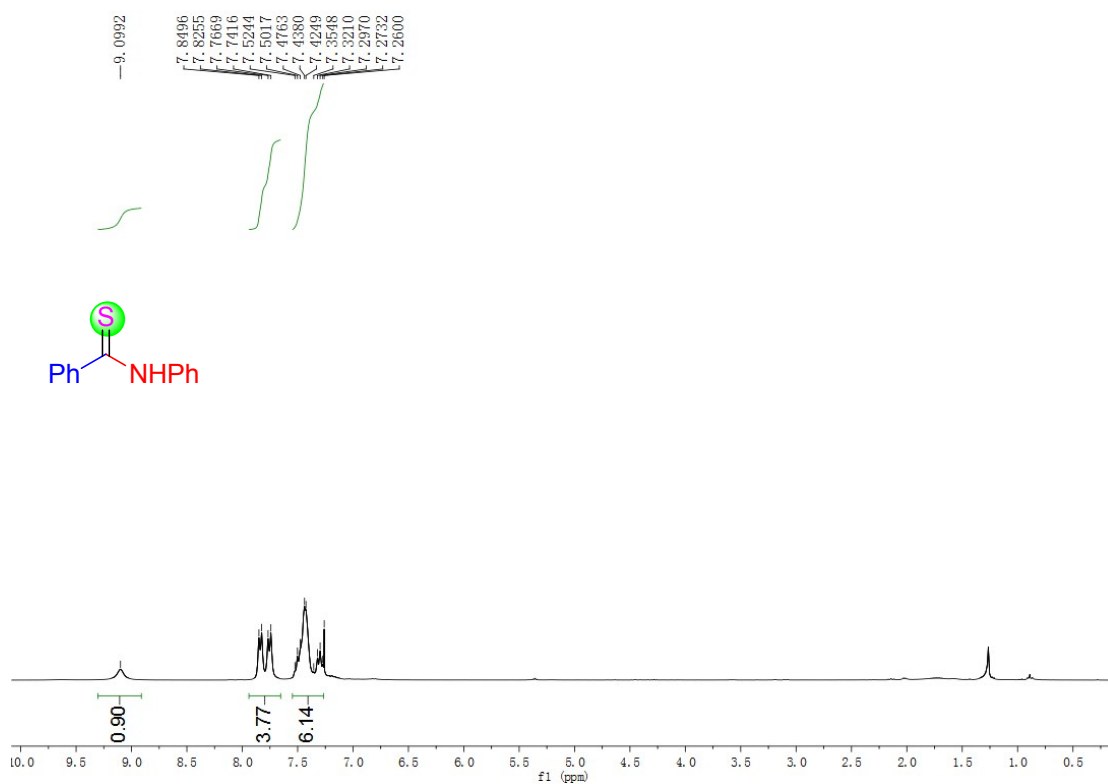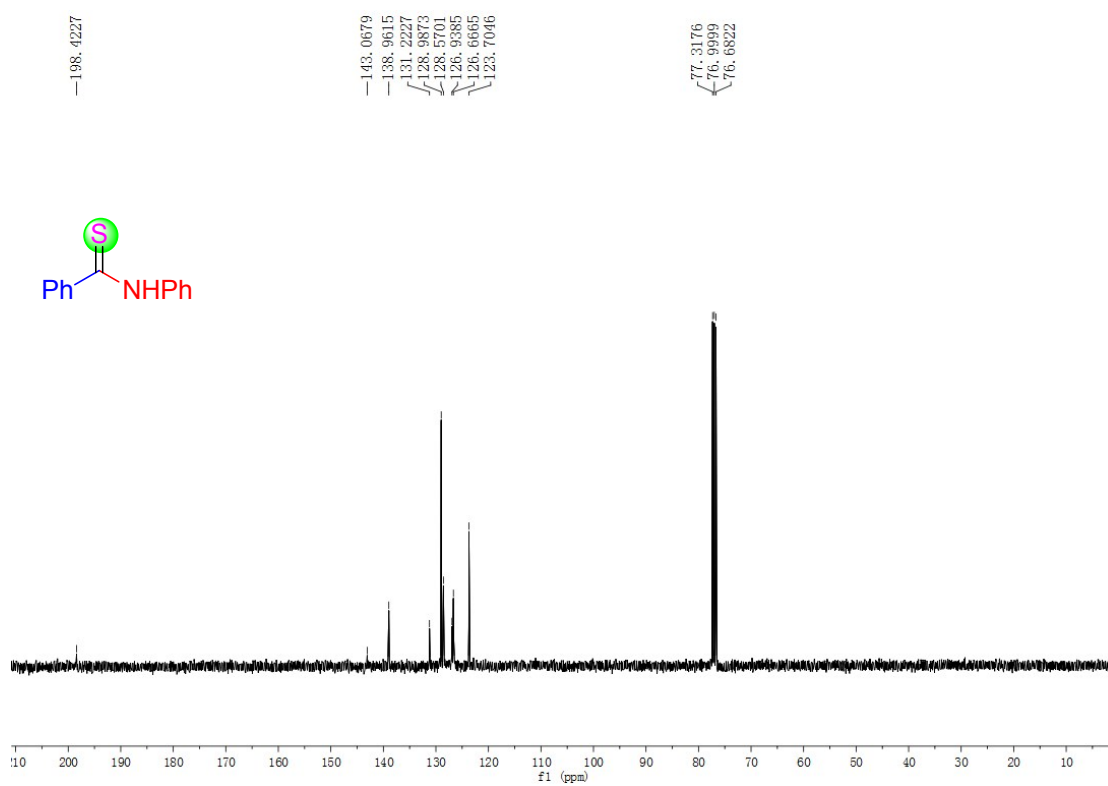

**Compound 22:**

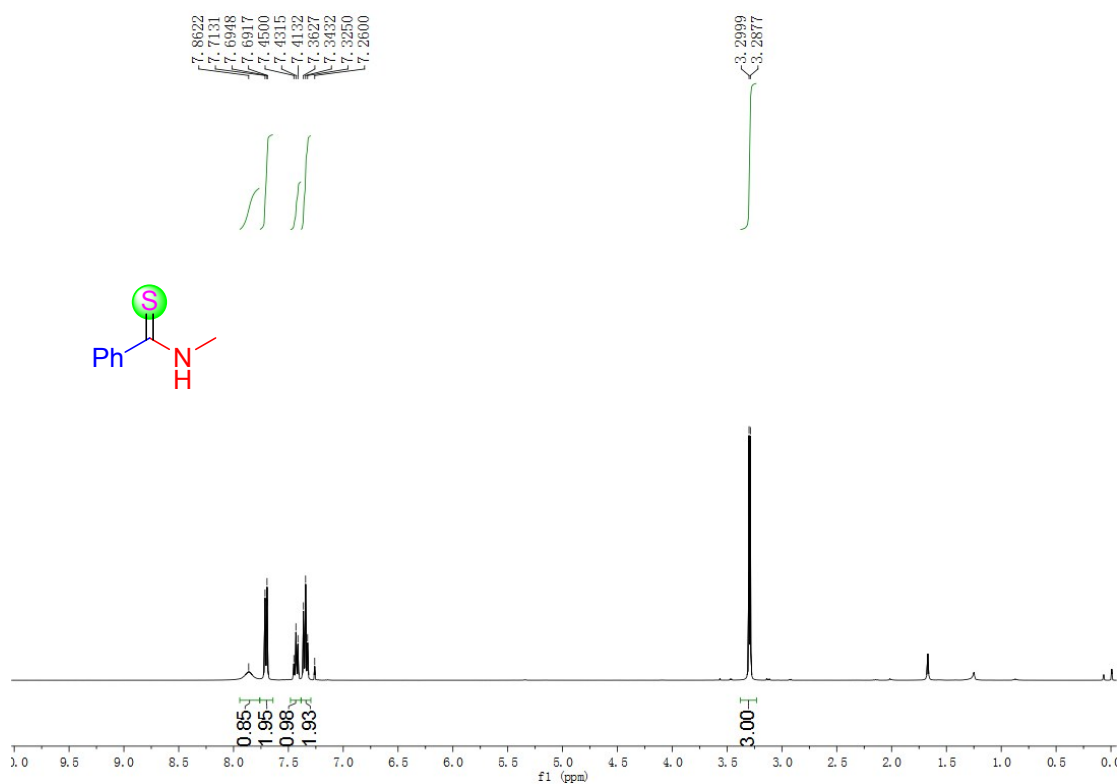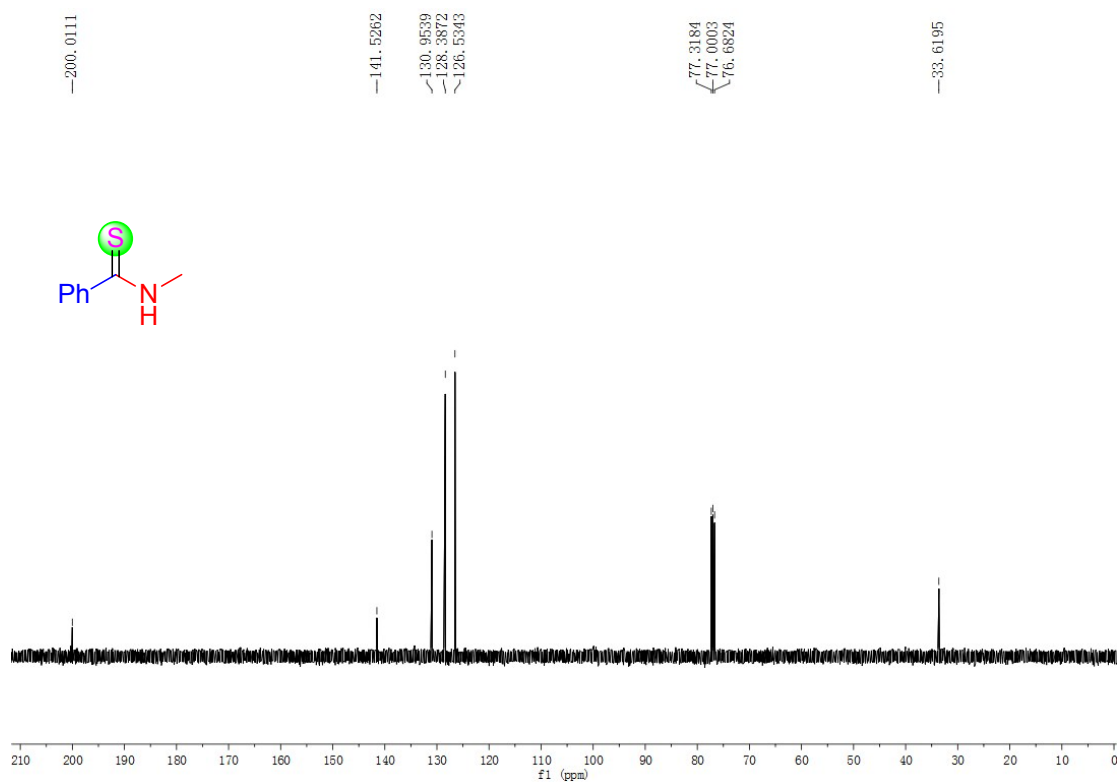



**Compound 23:**

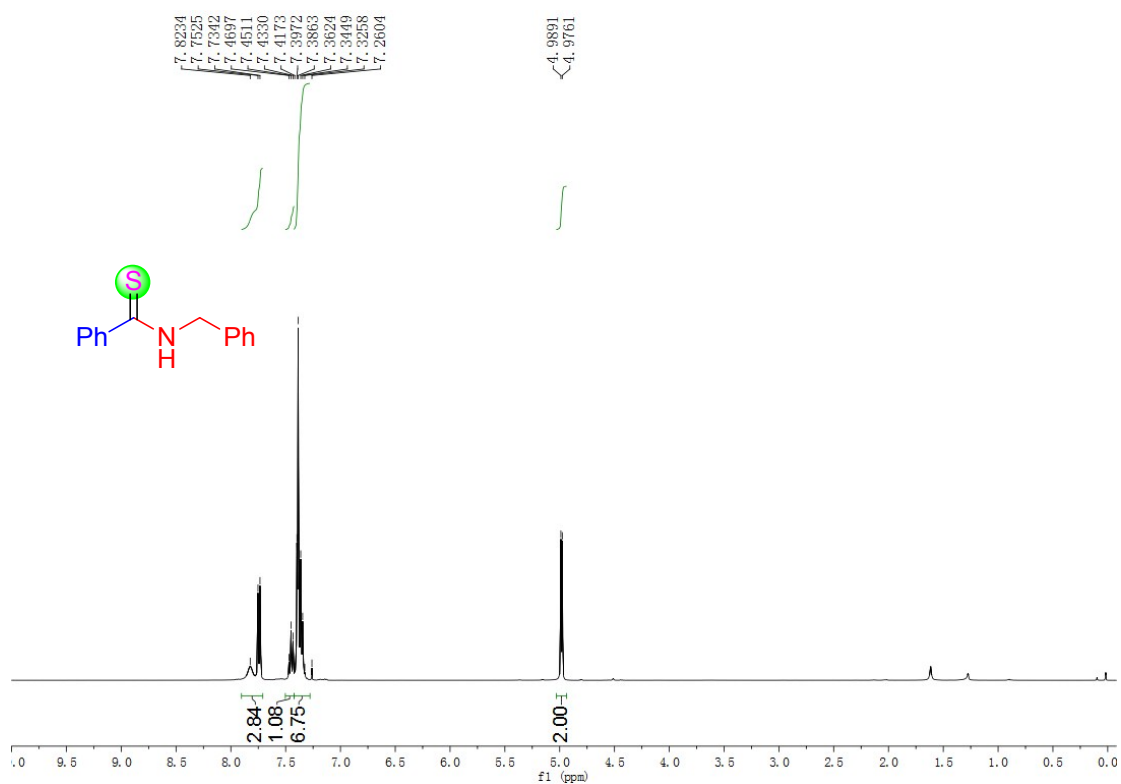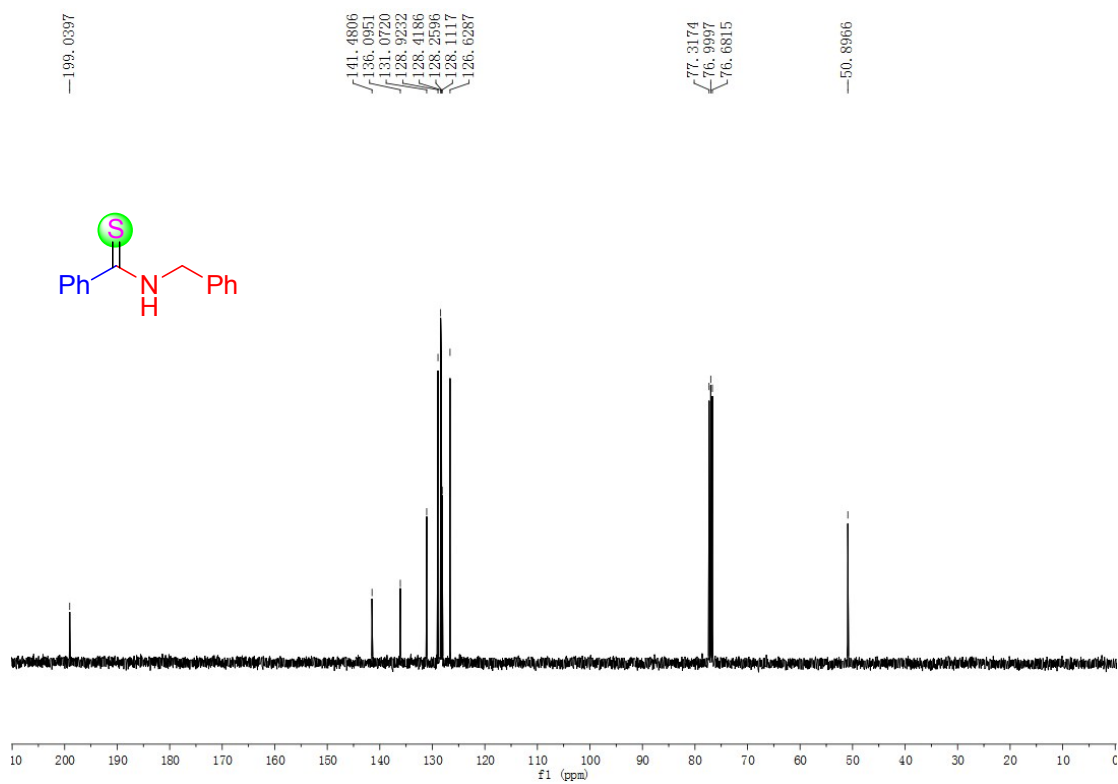

**Compound 24:**

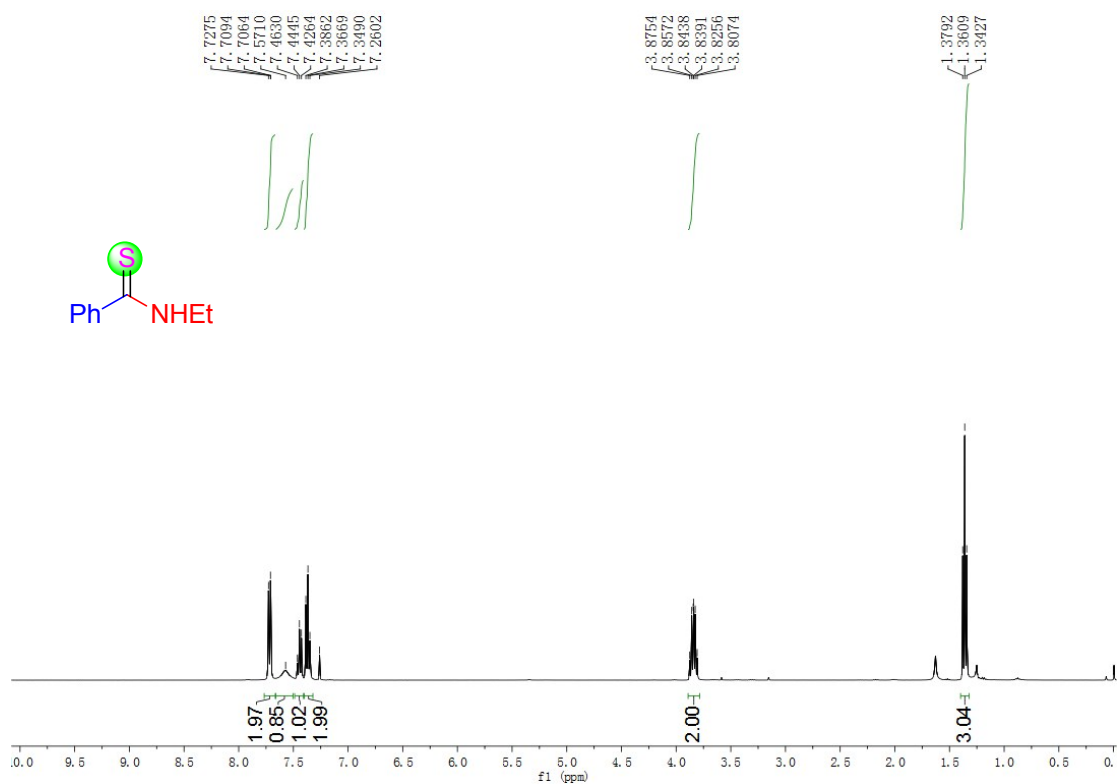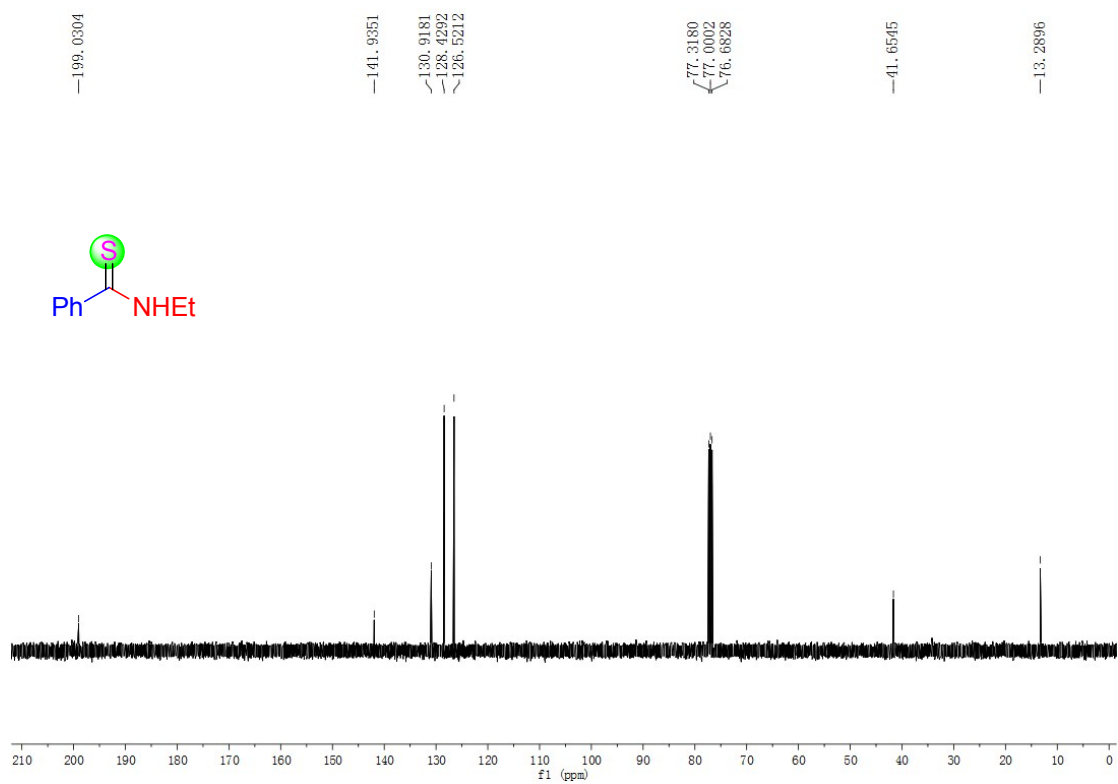

**Compound 25:**

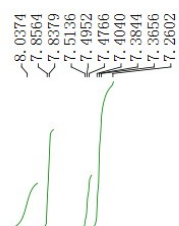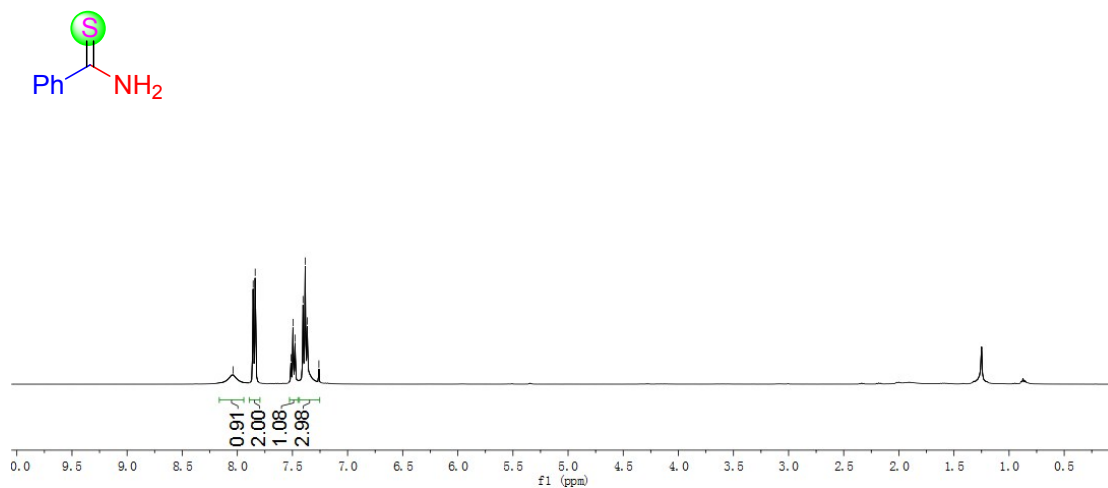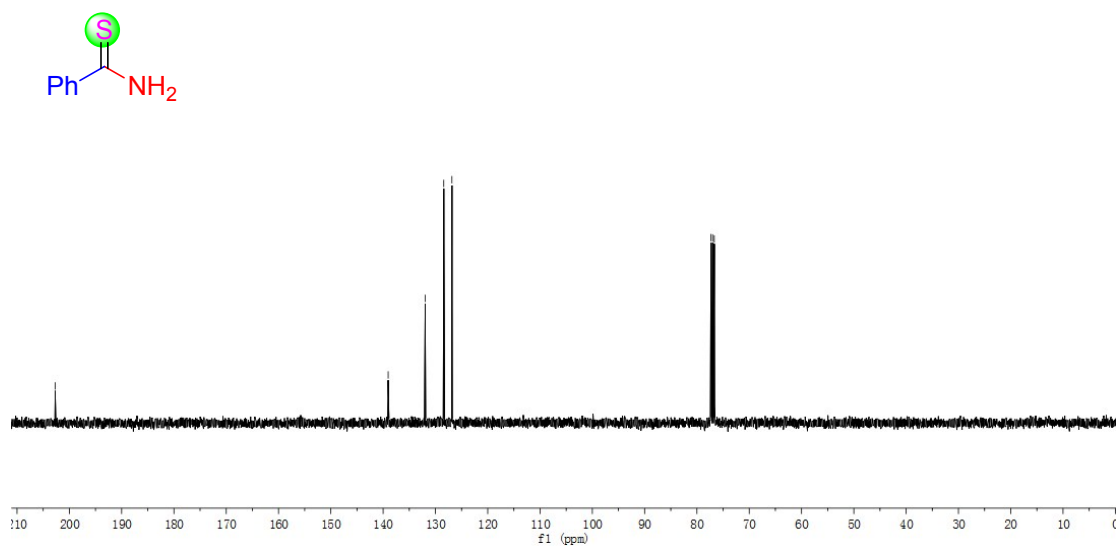

**Compound 26:**

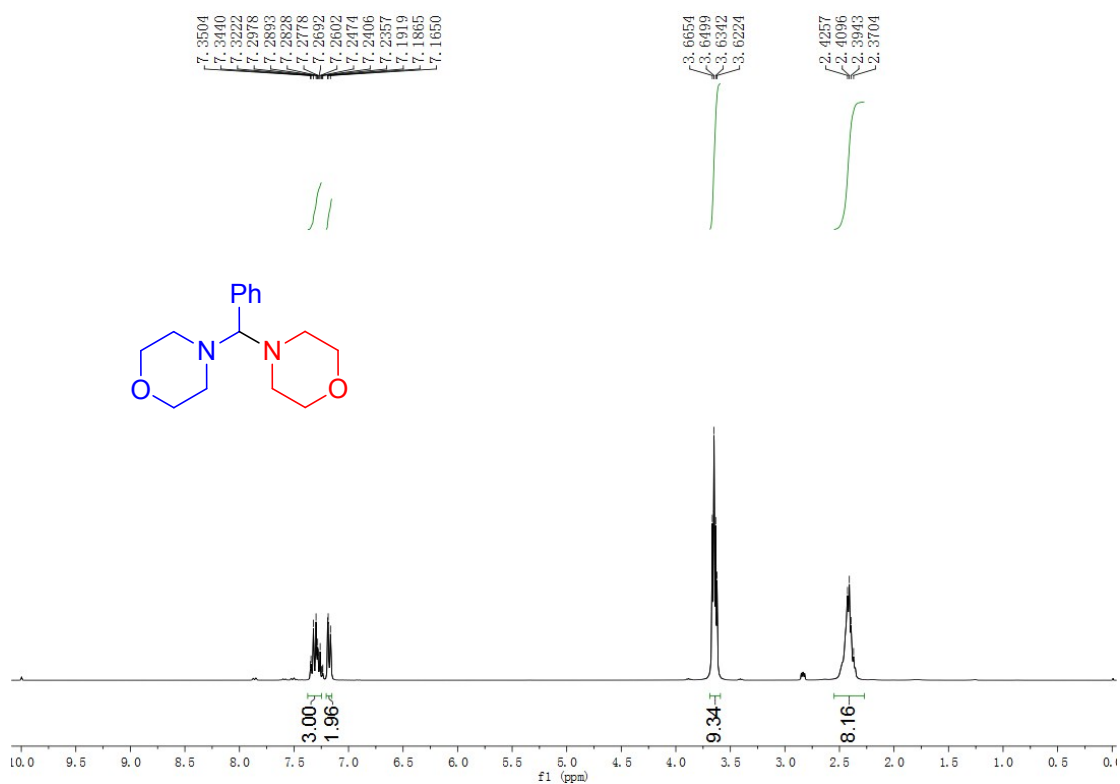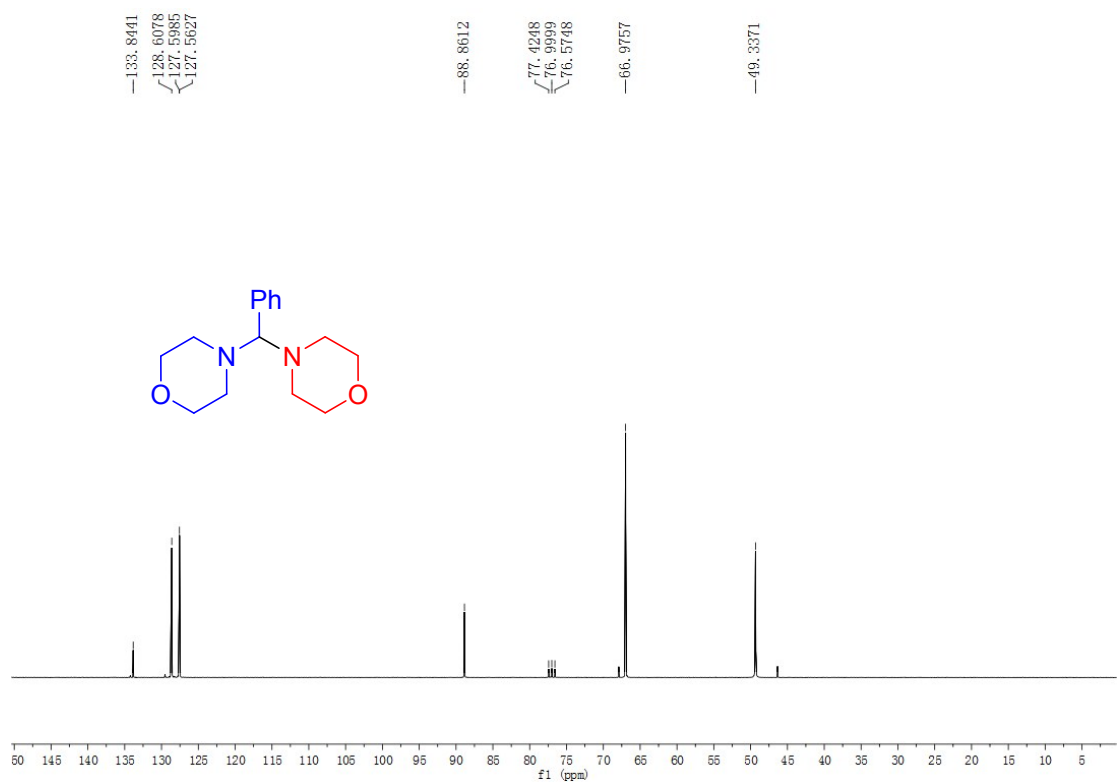

Supplement: c6qo00670a1.pdf [file c6qo00670a1.pdf]
